# 1 The sunlit microoxic niche of the archaeal eukaryotic ancestor comes 2 to light

3

4 Paul-Adrian Bulzu<sup>1#</sup>, Adrian-Ştefan Andrei<sup>2#</sup>, Michaela M. Salcher<sup>3</sup>, Maliheh Mehrshad<sup>2</sup>,  
5 Keiichi Inoue<sup>5</sup>, Hideki Kandori<sup>6</sup>, Oded Beja<sup>4</sup>, Rohit Ghai<sup>2\*</sup>, Horia L. Banciu<sup>1</sup>

6 <sup>1</sup>Department of Molecular Biology and Biotechnology, Faculty of Biology and Geology, Babeş-Bolyai  
7 University, Cluj-Napoca, Romania.

8 <sup>2</sup>Institute of Hydrobiology, Department of Aquatic Microbial Ecology, Biology Centre of the Academy  
9 of Sciences of the Czech Republic, České Budějovice, Czech Republic.

10 <sup>3</sup>Limnological Station, Institute of Plant and Microbial Biology, University of Zurich, Seestrasse 187,  
11 CH-8802 Kilchberg, Switzerland.

12 <sup>4</sup>Faculty of Biology, Technion Israel Institute of Technology, Haifa, Israel.

13 <sup>5</sup>The Institute for Solid State Physics, The University of Tokyo, Kashiwa, Japan

14 <sup>6</sup>Department of Life Science and Applied Chemistry, Nagoya Institute of Technology, Nagoya, Japan.

15

16

17

18

19 # These authors contributed equally to this work

20 \*Corresponding author: Rohit Ghai

21 Institute of Hydrobiology, Department of Aquatic Microbial Ecology, Biology Centre of the Academy  
22 of Sciences of the Czech Republic, Na Sádkách 7, 370 05, České Budějovice, Czech Republic.

23 Phone: +420 387 775 881

24 Fax: +420 385 310 248

25 E-mail: [ghai.rohit@gmail.com](mailto:ghai.rohit@gmail.com)

26

27

28

29

30

31

32

33

34

35

## 36 **Summary**

37 The discovery of Asgardaeota archaea, the closest extant relative of eukaryotes to date, has  
38 reignited the two-domain of life theory. While it is apparent that Asgardaeota encode multiple  
39 eukaryotic-specific proteins, the lack of genomic information and metabolic characterization has  
40 precluded inferences about the closest eukaryotic ancestor and the metabolic landscape that laid  
41 the grounds for the emergence of the hallmark eukaryotic subcellular architecture. Here, we  
42 propose that Heimdallarchaeia (phylum within Asgardaeota) are the closest extant relatives to all  
43 eukaryotes and shed light on their facultative aerobic lifestyle, characterized by the capacity to use  
44 Sun's energy and aerobic metabolic pathways unique among archaea. Remarkably, the visualization  
45 of Heimdallarchaeia organisms revealed a compacted genetic material that is highly unusual for  
46 prokaryotes at large. Our results support an evolutionary model in which both protoeukaryote  
47 ancestors (archaeal and bacterial) possessed the metabolic repertoire for oxygenic respiration and  
48 point towards a late mitochondrial acquisition.

49

## 50 **Main**

51 At the dawn of genomics, the eukaryotes were recognized as amalgamated genetic jigsaws that bore  
52 components of both bacterial and archaeal descent<sup>1,2</sup>. This genomic chimerism served as a source of  
53 speculation and debate over the nature of the protoeukaryote ancestors and inspired a plethora of  
54 hypothetical scenarios for the processes that led to eukaryogenesis<sup>2,3</sup>. Even though, in light of recent  
55 research, eukaryotes came into existence through the interplay between an archaeal host<sup>4</sup> and a  
56 bacterial endosymbiont<sup>5</sup>, the metabolic milieu of the ancestral prokaryotic lineages and their  
57 phylogenetic blueprint still remain elusive. Here, we bridge state-of-the-art cultivation-independent  
58 genomics, sensitive molecular phylogenetic analyses and genome-scale metabolic reconstructions in  
59 order to shed light upon the deep archaeal ancestors of eukaryotes, as well as the metabolic  
60 landscape that favored the rise of the 'nucleated cellular architecture'. The genomic catalogue  
61 generated during this study enabled us to confidently resolve the backbone of the Asgardaeota  
62 superphylum<sup>6</sup> (the closest archaeal relatives of eukaryotes described to date) and to narrow down  
63 the eukaryotes' branching point within the tree of life. Collectively, our analyses revealed that  
64 contradictory to current opinions<sup>7</sup> the archaeal protoeukaryote ancestor was likely a facultative  
65 aerobe that possessed the ability to harness the Sun's energy *via* rhodopsins, and whose  
66 mixotrophic metabolism had already acquired unprecedented (within archaea) circuitries for *de*  
67 *novo* aerobic NAD<sup>+</sup> synthesis.

68 *Asgardaeota phylogenomics*: Homology-based searches were employed to recover Asgardaeota-  
69 related contigs from *de novo* metagenomic assemblies of two deep-sequenced lake sediment  
70 samples (with contrasting salinities). By utilizing a hybrid binning strategy and performing manual  
71 inspection and data curation, we obtained thirty-five Asgardeota MAGs (metagenome-assembled  
72 genomes), spanning three (out of 4) evolutionary lineages within the superphylum: Lokiarchaeia  
73 (23), Thorarchaeia (10), and Heimdallarchaeia (2). To the best of our knowledge, by accurately  
74 binning 6 026 contigs (total length 55.75 Mbp, average contig length 9 252.5 bp) we generated the  
75 largest genomic dataset available to date for this superphylum (in contrast all publicly available  
76 MAGs amount to 47.2 Mbp). Due to the challenges associated with reconstructing the evolutionary  
77 relationships between archaea and eukayotes<sup>6</sup>, in our inferences we used only those MAGs (n= 8;  
78 **Supplementary Table S1**) that harbored at least 75% of total phylogenetic markers (See  
79 **Supplementary Table S3**). The maximum-likelihood phylogenetic tree, based on concatenation of  
80 small (SSU) and large (LSU) ribosomal RNA genes, pictured for the first time a topology in which  
81 eukaryotes branched with high-support from within Asgardeota (archaea) (**Supplementary Figure**  
82 **S1a**). Even more remarkably, additionally to recreating a previously described Asgardeota/Eukaryota

83 branching pattern<sup>6</sup>, we provide unprecedented support for a close evolutionary linkage between  
84 Heimdallarchaea (Asgardaeota superphylum) and eukaryotes (SH-aLRT=97.5; UFBoot=100)  
85 (**Supplementary Figure S1a**). The genome-focused phylogeny of Asgardaeota revealed a pattern of  
86 ancestry, divergence, and descent, in which Heimdallarchaea comprises the basal branch of the  
87 superphylum and Thor-/Odinarchaea the youngest one (**Figure 1a**). Although dissimilar in branching  
88 pattern with the SSU + LSU tree, the phylogenomic one was found to be robust (**Figure 1a**) and to  
89 support a topology brought into attention by an earlier study<sup>6</sup>. The SR4-recoded<sup>8</sup> Bayesian tree  
90 (maxdiff=0.1) resolved with high support (PP=1) the monophyly of Asgardaeota/Eukaryota, but failed  
91 to confidently resolve the internal topology of the superphylum and the branching point of  
92 eukaryotes (**Figure 1b**). Noteworthy, in both SR4-recoded Bayesian (**Figure 1b**) and maximum-  
93 likelihood phylogenies (**Supplementary Figure S1b**) the eukaryotes caused branch instability for  
94 Heimdallarchaea, which was attracted without statistical support within the superphylum (PP=0.52;  
95 SH-aLRT=92.4 and UFBoot=88). To further substantiate the phylogenetic connection between  
96 Asgardaeota members and eukaryotes, we screened all the recovered MAGs and the publicly  
97 available ones (14) for the presence of potential eukaryotic signature proteins (ESP). Similar to  
98 previous reports<sup>6,9,10</sup>, the MAGs were found to be highly enriched with ESP (**Figure 1c**), which further  
99 reinforced their ancestral linkage to eukaryotes. In addition to the reported ESP<sup>6</sup>, we identified a  
100 potential subunit of the COPII vesicle coat complex (associated with intracellular vesicle traffic and  
101 secretion) in Thorarchaea and proteins that harbor the N-terminal domain of folliculin - a eukaryote-  
102 specific protein which is known to be involved in membrane trafficking in humans<sup>11</sup> (**Figure 1c**) in  
103 Lokiarchaea. Furthermore, we retrieved conclusive hits for the ESP-related domains  
104 Ezrin/radixin/moesin C-terminal domain and active zone protein ELKS in Lokiarchaea.

105  
106 *A novel clade of rhodopsins*: Recent findings reporting the presence of a novel family of rhodopsins<sup>12</sup>  
107 (i.e. heliorhodopsins; abbreviated as HeR) in monoderms<sup>13</sup> encouraged us to perform a dedicated  
108 screening in all available Asgardaeota MAGs. The results indicated that one of the Heimdallarchaea  
109 MAGs (i.e. Heimdallarchaeota RS678) encoded two heliorhodopsins and what appears to be, as  
110 suggested by the presence of a *Exiguobacterium*-like DTK motif<sup>14</sup> and phylogenetic proximity, a type-  
111 1 proton-pumping rhodopsin (**Figure 2**). To the best of our knowledge, this is the first report of a  
112 proton-pumping rhodopsin in Asgardaeota. Remarkably, we found that the Asgardaeota MAGs  
113 recovered during this study encoded rhodopsin sequences similar in membrane orientation to type-  
114 1 rhodopsins, and which organized during phylogenetic analysis in a monophyletic clade (SBS=1)  
115 placed in-between HeR and type-1 ones (**Figure 2**). Multiple sequence alignments showed: i)  
116 homology between transmembrane helices 1, 6 and 7 of these new rhodopsins and the type-1  
117 rhodopsins, while helix 3 was homologous to HeR and ii) presence of additional characteristic HeR  
118 motifs (e.g. RWxF motif similar to RWxE of HeR rather than the RYxD motif in most type-1  
119 rhodopsins, and replacement of a proline residue (P91) conserved in type-1 rhodopsins by serine  
120 (S91) in both HeR and the new Asgardaeota-found ones) (**Supplementary Figure S2**). Given their  
121 phylogenetically intermediate position, as type-1 rhodopsins closest to HeR, and presence of  
122 features found in both type-1 and HeR, we denote them as schizorhodopsins (schizo, 'split', plus  
123 'rhodopsin', abbreviated as SzR). The very recent discovery of HeR and their inconclusive functional  
124 role<sup>12,13</sup> precludes tentative functional assertions for SzR capacity in Asgardaeota. However, the  
125 plethora of rhodopsins that we identified in Heimdallarchaea (putative type-1 proton pumps, HeR  
126 and SzR), together with the SzR found in Lokiarchaea and Thorarchaea suggests that, during its  
127 evolutionary history, Asgardaeota was present in light-exposed habitats. Moreover, we consider that  
128 the primary niche of these rhodopsin-bearing microbes is most likely the top, light exposed sediment  
129 layers. Their recovery from deeper strata may be explained by the high deposition rates  
130 characteristic for the sampling locations (typically a few cm per year)<sup>15</sup>.

131  
132

133 *Evidences for an aerobic lifestyle in Heimdallarchaeia*: The genome-scale metabolic reconstruction  
134 placed special emphasis on Heimdallarchaeia, since it was suggested by the above-mentioned  
135 phylogenetic analyses to encompass the most probable candidates (to date) for the archaeal  
136 protoeukaryote. While the anaerobic lifestyles inferred for Loki-<sup>7</sup> and Thorarchaeia<sup>10</sup> were  
137 considered to be accompanied by autotrophy<sup>7</sup> and respectively mixotrophy<sup>10</sup>, no consistent  
138 metabolic reconstructions exist to date for Heimdallarchaeia. The performed physiological  
139 inferences pointed towards mixotrophic lifestyles (for Asgardaeota), simultaneously showing the  
140 presence of transporters for the uptake of exogenous organic matter and the metabolic circuitry  
141 responsible for its catabolism (see Supplemental Results and Discussion). Remarkably, we found  
142 oxygen-dependent metabolic pathways in Heimdallarchaeia, which will be further presented in  
143 contrast to the ones harbored by the anaerobic Loki- and Thorarchaeia.

144 Heimdallarchaeia were inferred to possess components of the aerobic respiration blueprint: a  
145 complete tricarboxylic acid cycle (TCA) supported by an electron transport chain (ETC) containing:  
146 V/A-type ATPase, succinate dehydrogenase, NADH:quinone oxidoreductase, and the cytochrome c  
147 oxidase (**Figure 3**). While in Thor- various components of the TCA were found to be missing, in  
148 Lokiarchaeia the complete TCA was associated with: isocitrate dehydrogenases, 2-oxoglutarate-  
149 ferredoxin oxidoreductases, and ATP-citrate lyases, pointing towards the presence of a reverse  
150 tricarboxylic acid cycle (rTCA). Thus, in contrast with Heimdallarchaeia, which utilizes TCA to fuel  
151 their catabolic machinery (**Figure 3**), Lokiarchaeia uses rTCA for autotrophic CO<sub>2</sub> assimilation. While  
152 the V/A-type ATPase complex appears to be complete in Loki- and Thorarchaeia, the other  
153 components involved in the oxidative phosphorylation processes were not identified.

154  
155 As nicotinamide adenine dinucleotide (NAD<sup>+</sup>) is an essential cofactor in redox biochemistry and  
156 energetics<sup>16</sup> (e.g. linking TCA and ETC), we investigated its *de novo* synthesis mechanisms (**Figure 4**).  
157 As expected all Asgardaeota phyla were found to harbor the aspartate pathway<sup>17</sup> - a set of metabolic  
158 transformations that can occur in both presence or absence of oxygen<sup>18</sup>, and which are characteristic  
159 for most prokaryotes and the plastid-bearing eukaryotes (obtained through lateral gene transfer  
160 from their cyanobacterial endosymbiont)<sup>16</sup>. Surprisingly, Heimdallarchaeia presented in addition to  
161 the aspartate pathway the exclusively aerobic kynurenine one<sup>19</sup> (**Figure 4**), which is reported to be  
162 present in few bacterial groups and eukaryotes<sup>16</sup>. The phylogenetic reconstruction and evolutionary  
163 history inferences showed that this pathway, which is considered to be present in the  
164 protoeukaryote ancestor<sup>16</sup>, was probably acquired by Heimdallarchaeia through lateral gene transfer  
165 from bacteria (**Supplementary Figure S3**). As far as the authors are aware, Heimdallarchaeia are the  
166 first archaeal organisms with the aerobic kynurenine pathway. Curiously while Heimdall\_LC\_3 was  
167 found to contain the complete set of genes required for both pathways, Heimdall\_LC\_2 and  
168 Heimdall\_RS678 encoded just the genes affiliated with the kynurenine one (**Figure 4**). As the  
169 aspartate pathway was reported to function in both oxygen absence (L-aspartate oxidase uses  
170 fumarate as electron acceptor)<sup>18</sup> and presence (L-aspartate oxidase uses O<sub>2</sub> as electron acceptor),  
171 the existence of the kynurenine pathway in Heimdall\_LC\_3 appears redundant. By corroborating the  
172 presence/absence pattern of the aspartate pathway in Asgardaeota (**Figure 4**) with the  
173 reconstructed evolutionary history of Heimdallarchaeia (**Figure 1a, b**; **Supplementary Figure S1a, b**)  
174 and blastp similarity searches (for Heimdall\_LC\_3 L-aspartate oxidase), we inferred that this pathway  
175 functioned exclusively under anaerobic conditions. Furthermore, the introgression of kynurenine  
176 genes in Heimdallarchaeia appears to be caused by an expansion towards an oxygen-containing  
177 niche, which during evolutionary history (from Heimdall\_LC\_3 to Heimdall\_LC\_2/Heimdall\_RS678)  
178 favored the xenologous replacement of the aspartate pathway with the kynurenine one.

179  
180 Within the anaplerotic metabolism, the reversible transformation of pyruvate into acetyl-CoA and  
181 formate can be accomplished by pyruvate formate lyases, which were inferred to be present in all  
182 three phyla. Formate produced during this enzymatic process, or by the activity of arylformamidase  
183 (kynurenine formamidase) in Loki and Heimdallarchaeia could be further oxidized (by formate

184 dehydrogenases) and used for quinone/cytochrome pool reduction, or introduced into the one-  
185 carbon metabolism and utilized for the synthesis of: purines, glycine, formylmethionine, etc. (**Figure**  
186 **3**). Uniquely in Heimdallarchaeaia we inferred that formate could act as electron donor during aerobic  
187 respiration through the actions of the heterotrimeric formate dehydrogenase O. This enzyme  
188 facilitates the usage of formate under aerobiosis, and together with nitrate reductase Z (also present  
189 solely in Heimdallarchaeaia) may participate in a formate to nitrate electron transport pathway that is  
190 active when cells are shifted from aerobic to anaerobic conditions<sup>20,21</sup>. The presence of genes  
191 encoding pyruvate oxidases (poxL) in Heimdallarchaeaia (i.e. LC\_2 and LC\_3) implies further oxygen  
192 usage, as the enzyme employs it in the pyruvate pool decarboxylation process (**Figure 3**).

193  
194 The comparative genomic analyses also revealed that the three Asgardaeota phyla rely upon  
195 glycolysis (i.e. type Embden-Meyerhof-Parnas) to fuel their metabolic machinery. Unexpectedly,  
196 three Heimdallarchaeaia MAGs (LC\_3, AB\_125 and AMARA\_4) were found to employ non-canonical  
197 ADP-dependent kinases that use ADP instead of the typical ATP as the phosphoryl group donor<sup>22</sup> in  
198 their glycolytic pathways. Furthermore, they seemed to be bifunctional ADP-dependent  
199 glucokinase/phosphofructokinase, which was puzzling since the presence of 6-phosphofructokinases  
200 (LC\_3 and AB\_125) would render their bifunctionality redundant. In order to elucidate the role of the  
201 putative bifunctional enzymes, we reconstructed the evolutionary history of the ADP-dependent  
202 kinases and inferred that they possess glucokinase activity (based on tree topology and the  
203 conserved functional residue E172) (**Supplementary Figure S4**). Additionally, we observed that the  
204 deepest branching Heimdallarchaeaia (LC\_3) harbored the archaeal-type of the enzyme, while the  
205 younger ones (AB\_125 and AMARA\_4) clustered together with the eukaryotic-type (**Supplementary**  
206 **Figure S4**). Although it is easy to assume that cells under low energy conditions (e.g. limiting O<sub>2</sub>  
207 availability) could highly benefit from using residual ADP to activate sugar moieties and fuel their  
208 glycolysis<sup>23</sup>, the metabolic advantage conferred by these ADP-dependent kinases is unclear.

209  
210 Although pentoses could be recycled via nucleotide degradation in all Asgardaeota phyla, their  
211 synthesis differs between Loki-/Heimdallarchaeaia that likely utilize the reverse ribulose  
212 monophosphate pathway, and Thorarchaeaia that employ the xylulose part (of the non-oxidative  
213 branch) of the hexose monophosphate one. The identified homologues for ribulose 1,5-  
214 bisphosphate carboxylase/oxygenase (RuBisCO) genes were found to appertain to the types: III (Loki-  
215 and Heimdallarchaeaia) and IV (Loki- and Thorarchaeaia) (**Supplementary Figure S5**). While RuBisCO is  
216 a key enzyme for CO<sub>2</sub> fixation in the Calvin-Benson-Bassham cycle, the absence of  
217 phosphoribulokinase renders this metabolic pathway highly improbable. However, we consider that  
218 the MAGs encoding type III-like RuBisCO (assigned to Loki- and Heimdallarchaeaia) use the nucleotide  
219 monophosphate degradation pathway<sup>24,25</sup>, thus performing CO<sub>2</sub> fixation by linking nucleoside  
220 catabolism to glycolysis/gluconeogenesis. This conclusion is supported by the co-occurrence of  
221 genes encoding for: RuBisCO type III, AMP phosphorylases, ribose 1,5-bisphosphate isomerases, and  
222 carbonic anhydrases. While carbon monoxide (CO) can be used as carbon and energy source in both  
223 aerobic and anaerobic metabolisms<sup>26</sup>, the types of enzymes involved in the reaction are dependent  
224 upon the available electron acceptor. Thus, while Heimdallarchaeaia harbor all three major subunits  
225 of the aerobic carbon monoxide dehydrogenases (CODH), Loki- and Thorarchaeaia encoded the  
226 oxygen-sensitive carbon monoxide dehydrogenase/acetyl-CoA synthase (CODH/ACS). We infer that  
227 while Heimdallarchaeaia uses CO to obtain energy by shuttling the electrons generated from CO  
228 oxidation to oxygen or nitrate, Thor- and Lokiarchaeaia may utilize CO as both electron source and  
229 intermediary substrate in the ancient Wood-Ljungdahl carbon fixation pathway<sup>27,28</sup> (through  
230 CODH/ACS).

231  
232 Among Asgardaeota, the Heimdallarchaeaia were found to possess genes encoding for  
233 sulfide:quinone oxidoreductases, enzymes used in sulfide detoxification and energy generation  
234 through quinone pool reduction (**Figure 3**). As sulfide binds to cytochrome c oxidase system and



235 inhibits aerobic respiration<sup>29</sup>, the presence of these enzymes in Heimdallarchaeia could point  
236 towards a detoxification role. The fact that one Heimdallarchaeia MAGs described in this study (i.e.  
237 AMARA\_4) had the sulfide:quinone oxidoreductase gene and the other Asgardaeota MAGs  
238 recovered from the same sample did not (i.e. 7 Loki- and 3 Thorarchaeia MAGs), suggests that the  
239 highly lipophilic sulfide does not interfere with the anaerobic metabolism, nor is it part of a  
240 conserved energy generation strategy in Asgardaeota. The superoxide dismutase, catalases, and  
241 glutathione peroxidases found in Heimdallarchaeia may act in alleviating the oxidative damaged  
242 generated by a facultative aerobic metabolism.

243 *CARD-FISH visualization of Loki- and Heimdallarchaeia.* Two phylogenetic probes targeting the 16S  
244 rRNA of Loki- and Heimdallarchaeia, respectively (**Supplementary Table S8, Supplementary Figure**  
245 **S7**) were successfully applied to sediment samples of different depth layers. Members of both phyla  
246 were rare and seemed to be totally absent below sediment depths of 40 cm. All observed  
247 Heimdallarchaeia were similar in cell size ( $2.0\pm 0.4$   $\mu\text{m}$  length x  $1.4\pm 0.3$   $\mu\text{m}$  width, n=15) and of  
248 conspicuous shape with DNA condensed ( $0.8\pm 0.2$  x  $0.5\pm 0.1$   $\mu\text{m}$ ) at the center of the cells (**Figure 5 a-**  
249 **c, Supplementary Figure S8**), what is rather atypical for prokaryotes. In contrast, Lokiarchaeia were  
250 very diverse in shape and size and we could distinguish at least three different morphotypes: small-  
251 medium sized ovoid cells ( $2.0\pm 0.5$  x  $1.3\pm 0.3$   $\mu\text{m}$ , n=23, **Figure 5 d-f, Supplementary Figure S9**), large  
252 round cells ( $3.8$  x  $3.6$   $\mu\text{m}$ , **Figure 5 g-i**) with condensed DNA at the center, and large rods/filaments  
253 ( $4.4\pm 1.2$  x  $1.4\pm 0.5$   $\mu\text{m}$ , n=6, **Figure 5 j-l, Supplementary Figure S9**) with filamentous, condensed DNA  
254 ( $2.7\pm 1.4$  x  $0.4\pm 0.1$   $\mu\text{m}$ ) that were exclusively present in 30-40 cm sediment depth. This high diversity  
255 in morphology in Lokiarchaeia most likely also reflects a higher sampling of the phylogenetic  
256 diversity within the phylum.

## 257 Discussion

258 The mainstream theories on the subject of eukaryogenesis<sup>3,30</sup> (which date back to late 20<sup>th</sup> century),  
259 have been recently refuted by improved phylogenetic methods and increased genomic sampling<sup>6,7</sup>.  
260 Even after experiencing a new revival<sup>7</sup>, the current endosymbiotic theory fails to envision the  
261 environmental and metabolic context in which the ‘nucleated cellular architecture’ emerged.  
262 Moreover, it appears to find itself gravitating around a three-decade old theory centered on  
263 anaerobic syntrophy<sup>31</sup> (i.e. hydrogen hypothesis). In this study, we show that: i) mixotrophy and  
264 harnessing Sun’s energy (*via* rhodopsins) are the *modus vivendi* of Asgardaeota, and that ii) aerobic  
265 respiration was present in the archaeal protoeukaryote ancestor before the emergence of  
266 eukaryogenesis-associated phenomena. The ‘aerobic-protoeukaryotes’ model surpasses some of the  
267 theoretical shortcomings of the ‘hydrogen hypothesis’ by envisioning an endosymbiotic association  
268 in which the primordial function of the bacterial counterpart (i.e. oxidative phosphorylation) would  
269 not be detrimental for the existence of the archaeal one (caused by oxygen exposure). We postulate  
270 that in the light of these results the previous hypotheses regarding the metabolic capacities of the  
271 protoeukaryote ancestors need to be reevaluated.

272

## 273 Methods

274 **Sampling:** Sediment sampling was performed on 10 October 2017 at 12:00 in Tekirghiol Lake,  
275 Romania, (44°03.19017 N, 28°36.19083 E) and on 11 October 2017 at 15:00 in Amara Lake, Romania,  
276 (44°36.30650 N, 27°19.52950 E). Two plunger cores of 0.3 m each were collected from a water depth  
277 of 0.8 m in Tekirghiol Lake and 4 m in Amara Lake. Sediment samples were stored in the dark at 4 °C  
278 and processed within 24 hours after collection.

279 **DNA extraction and purification:** DNA was extracted from approximately 10 g of wet sediment from  
280 each mixed core sample using the DNeasy PowerMax Soil Kit (Qiagen, Hilden, Germany) following  
281 the manufacturer’s instructions. Extracted DNA was further purified by passing it through humic acid  
282 removal columns (type IV-HRC) provided in the ZR Soil Microbe DNA MiniPrep kit (Zymo Research,

283 Irvine, CA, USA). Purified DNA was quality checked and quantified using a ND-1000 NanoDrop  
284 spectrophotometer (Thermo Scientific, Waltham, MA, USA). DNA integrity was assessed by agarose  
285 gel (1%) electrophoresis and ethidium bromide staining. The samples were denominated as AMARA  
286 and TEKIR in accordance with their site of origin. From each sample, 4 µg of pure DNA were vacuum  
287 dried in a SpeedVac concentrator (Thermo Scientific, Hilden, Germany) and shipped for library  
288 construction and NGS sequencing to Macrogen (Seoul, South Korea).

289 **Sequencing and data preprocessing:** Library preparation was performed by the commercial  
290 company by using the TruSeq DNA PCR Free Library prep kit (Illumina). Whole-genome shotgun  
291 sequencing of the 150 paired-end libraries (350bp insert size) was done using a HiSeq X (Illumina)  
292 platform. The amount of total raw sequence data generated for each metagenome was: 64.5Gbp  
293 for Amara and 57.6 Gbp for Tekirghiol. Preprocessing of raw Illumina reads was carried out by using  
294 a combination of software tools from the BBDMap<sup>32</sup> project  
295 (<https://github.com/BioInfoTools/BBMap/>). Briefly, bbdduk.sh was used to remove poor quality  
296 sequences (qtrim=rl trimq=18), to identify phiX and p-Fosil2 control reads (k=21 ref=vectorfile  
297 ordered cardinality), and to remove Illumina adapters (k=21 ref=adapterfile ordered cardinality).

298 **Abundance estimation for Loki- and Heimdallarchaea:** Preprocessed Illumina sets from Amara and  
299 Tekirghiol lakes, as well as published<sup>9</sup> set SRX684858 from Loki's castle marine sediment  
300 metagenome, were subsampled to 20 million reads by reformat.sh<sup>33</sup>. Each subset was queried for  
301 putative RNA sequences by scanning with UBLAST<sup>34</sup> against the non-redundant SILVA  
302 SSURef\_NR99\_132 database<sup>35</sup>, that was priorly clustered at 85% sequence identity by UCLUST<sup>34</sup>.  
303 Identified putative 16S rRNA sequences (e-value < 1e-5) were screened using SSU-ALIGN<sup>36</sup>. Resulting  
304 bona fide 16S rRNA sequences were compared by blastn<sup>37</sup> (e-value < 1e-5) against the curated SILVA  
305 SSURef\_NR99\_132 database. Matches with identity ≥ 80% and alignment length ≥ 90 bp were  
306 considered for downstream analyses. Sequences assigned to Loki- and Heimdallarchaea were used to  
307 calculate abundances for these taxa in their originating environments (**Figure 5**).

308 **Metagenome assembly and binning:** *De novo* assembly of preprocessed paired-end Illumina reads  
309 was done by Megahit<sup>38</sup> v.1.1.1 with k-mer list: 39, 49, 69, 89, 109, 129, 149, and with default  
310 parameters. Assembled contigs with minimum nucleotide fragment length of 3 kbp were binned by a  
311 combination of taxonomy-dependent and -independent methods. Protein coding genes were  
312 predicted by MetaProdigal<sup>39</sup>. Taxonomy dependent binning was achieved by first assigning  
313 taxonomy labels to the predicted genes by performing screenings with MMseqs2<sup>40</sup> against the NR  
314 database. All contigs with a minimum of 30 % genes assigned to Asgardaeota were used for  
315 taxonomy-independent binning. Mean base coverage for each contig was computed with bbwrap.sh  
316 (default parameters) by mapping to assembled contigs the preprocessed reads from AMARA and  
317 TEKIR datasets. Hybrid binning (based on tetranucleotide frequencies and coverage data) was  
318 performed using MetaBAT2<sup>41</sup> with default parameters. Bin completeness, contamination and strain  
319 heterogeneity were estimated using CheckM<sup>42</sup> with default parameters. Poorly resolved bins (i.e.  
320 contamination > 10%, unbinned contigs) were further manually curated by a combination of  
321 tetranucleotide frequency PCA graphs and repeated rounds of contamination/completeness  
322 assessment by CheckM. Final curated bins with CheckM estimated completeness above 10% and  
323 contamination below 10% were denominated as metagenome assembled genomes (MAGs). A total  
324 of 35 MAGs were recovered: 23 Lokiarchaeaia, 10 Thorarchaeaia and 2 Heimdallarchaeaia  
325 (**Supplementary Table S1**). Unbinned contigs were kept for further analyses (total nucleotide  
326 bases/site: 3.46 Mbp Amara and 4.06 Mbp Tekirghiol).

327 **Genome annotation:** Publicly available Asgardaeota genomes were downloaded from the NCBI  
328 Genome section (<https://www.ncbi.nlm.nih.gov/genome>). Coding sequences were predicted *de*  
329 *novo* with Prokka<sup>43</sup> for all available Asgard MAGs (35 from this study, 14 from NCBI – Accession  
330 numbers can be found in **Supplementary Table S2**). BlastKOALA<sup>44</sup> was used to assign KO identifiers  
331 (K numbers) to orthologous genes (**Supplementary Table S3**). Inferences of metabolic pathways and

332 general biological functions were conducted with the online KEGG mapping tools  
333 (<https://www.genome.jp/kegg/kegg1b.html>) using summarized KO numbers assigned to each group.  
334 Odinararchaeia was not considered for metabolic reconstruction due to lack of new genomic data.  
335 Ribosomal RNA (rRNA)-coding regions (16S, 23S) and transfer RNA (tRNA)-coding regions were  
336 predicted with Barrnap (<https://github.com/tseemann/barrnap>) and tRNAscan-SE<sup>45</sup>, respectively. All  
337 predicted proteins were queried against NCBI NR, COGs (cluster of orthologous groups) and arCOGs  
338 (archaeal cluster of orthologous groups, 2014)<sup>46</sup>. A local version of InterProScan<sup>47</sup> was used with  
339 default settings to annotate protein domains. Potential eukaryote specific proteins (ESPs) were  
340 identified based on previously published lists of IPR domains<sup>6</sup> (**Supplementary Table S4**) identified  
341 in Asgard archaea. New ESPs were searched based on key words related to eukaryotic specific  
342 processes and/or structures. All IPR domains present exclusively in newly recovered Asgardaeota  
343 genomes were manually screened by querying accession numbers against the online InterPro  
344 database (<https://www.ebi.ac.uk/interpro/search/sequence-search>), for associations with  
345 eukaryotic specific domains. A previously identified<sup>6</sup> ESP - DNA polymerase epsilon, catalytic subunit  
346 (IPR029703) - was identified by querying all MAG proteomes with human sequences  
347 (**Supplementary Table S4**). Several candidate ESP sequences were further analyzed using  
348 jackhmmer<sup>48</sup>, Phyre2<sup>49</sup> and Phobius<sup>50</sup>.

349 **Phylogenetic trees:** A total of 131 taxa were considered for concatenated small subunit (SSU) and  
350 larger subunit (LSU) ribosomal RNA phylogenetic analyses, consisting of: 97 archaea (37  
351 Euryarchaeota, 24 Crenarchaeota, 2 Bathyarchaeota, 15 Thaumarchaeota, 3 Aigarchaeota, 2  
352 Korarchaeota, 14 Asgardeota), 21 bacteria and 13 eukaryotes (**Supplementary Table S5**). SSU and  
353 LSU sequences were aligned independently by PRANK<sup>51</sup> (parameters: -DNA +F), trimmed using  
354 BMGE<sup>52</sup> (-m DNAPAM250:4 -g 0.5) and concatenated. Members of the DPANN group of Archaea  
355 (Diapherotrites, Parvarchaeota, Aenigmarchaeota, Nanoarchaeota, Nanohaloarchaeota,  
356 Woesearchaeota, and Pacearchaeota) were not included due to their known tendency to cause  
357 phylogenetic artefacts (detailed previously<sup>6</sup>). Maximum-Likelihood phylogeny for concatenated  
358 SSU/LSU gene sequences was inferred using IQ-TREE (-m GTR+I+G4) with ultrafast bootstrapping -bb  
359 1000 and Shimodaira-Hasegawa testing -alrt 1000<sup>53,54</sup>.

360 A total of 93 taxa were considered for concatenated ribosomal protein phylogenomic analyses,  
361 consisting of: 85 Archaea (25 Euryarchaeota, 22 Crenarchaeota, 2 Bathyarchaeota, 4  
362 Thaumarchaeota, 1 Aigarchaeota, 3 Korarchaeota, 21 Asgardeota, 7 DPANN) and 8 eukaryotes  
363 (**Supplementary Table S5**). Selection criteria for phylogenomic trees of ribosomal proteins conserved  
364 between archaea and eukaryotes has been previously described<sup>6</sup>. Amino-acid sequences for the 55  
365 ribosomal proteins were queried and retrieved based on arCOG annotations. Markers not found in  
366 the majority of organisms were discarded, obtaining a final set of 48 markers (**Supplementary Table**  
367 **S6**). Additionally, some proteins that were not identified by arCOG scanning were retrieved from the  
368 NCBI Protein section (<https://www.ncbi.nlm.nih.gov/protein>). Sequences were aligned using PRANK  
369 (-protein +F), trimmed with BMGE<sup>52</sup> (-m BLOSUM30 -t AA -g 0.2 -b 3), concatenated, and subjected  
370 to SR4 amino acid recoding<sup>8</sup>. Maximum-likelihood trees were generated by IQ-TREE (-bb 1000, -alrt  
371 1000) with ultrafast bootstrapping<sup>53</sup> and the custom 'C60SR4' model described in a previous study<sup>6</sup>.  
372 Bayesian inference phylogenies were constructed using PhyloBayes MPI 1.8<sup>55</sup>, using the CAT-Poisson  
373 model. Four chains were run in parallel until estimated maxdiff values calculated by bp\_comp (-x  
374 5000 10) fell below the recommended 0.3 threshold, indicating convergence between chains.

375 **Multiple sequence alignment of rhodopsins:** The three groups of rhodopsins (type-1,  
376 schizorhodopsins and heliorhodopsins), were first aligned independently using T\_Coffee<sup>56</sup>  
377 (<http://tcoffee.crg.cat/>) in accurate mode, that employs protein structure information, wherever  
378 available, or sequence comparisons with homologues in databases to improve accuracy. These  
379 alignments were aligned to each other using the profile alignment mode in T\_Coffee.



380 **RuBisCO tree reconstruction:** The multiple sequence RuBisCO alignment was built upon a core  
381 structural alignment of diverse set of sequences, to which additional sequences were added using  
382 T\_Coffee. A total of 392 sequences were used for the alignment. MUSCLE<sup>57</sup> was used for aligning the  
383 sequences (n=146) of the large subunit of RubisCO (types I-III) and RubisCO-like (type IV) (rbcL,  
384 K01601) proteins. Sequences not generated in this study were recovered from previous studies<sup>58,59</sup>.  
385 For both alignments the maximum likelihood tree was constructed with FastTree2 using a JTT model,  
386 a gamma approximation, and 100 bootstrap replicates.

387 **Phylogenetic inference of Heimdallarchaea glucokinases and kynurenine pathway proteins:** ADP-  
388 dependent phosphofructokinase/glucokinase protein sequences were identified by their assigned  
389 KO number (K00918) in 3 MAGs (AMARA\_4, Heimdall\_AB\_125, Heimdall\_LC\_3). Retrieved  
390 sequences were used along with 49 other sugar kinases published in a previous study<sup>60</sup>. Protein  
391 sequences of components of the kynurenine pathway - tryptophan 2,3-dioxygenase (TDO),  
392 kynurenine 3-monooxygenase (KMO) and 3-hydroxyanthranilate 3,4-dioxygenase (HAAO) – that  
393 were identified only in Heimdallarchaea MAGs, were used along with sequences of corresponding  
394 enzymes from 12 Eukaryotes and 15 Bacteria that were retrieved from NCBI RefSeq (Accession  
395 numbers in **Supplementary Table S7**). MAFFT-L-INS-i<sup>61</sup> (default parameters) and PRANK<sup>51</sup>  
396 (parameters: -DNA +F) were used for aligning sugar kinase and respectively kynurenine pathway  
397 enzyme sequences followed by trimming using BMGE<sup>52</sup> (-m BLOSUM30 -t AA -g 0.5 -b 3). Single  
398 protein maximum likelihood trees were constructed with FastTree2<sup>62</sup>, using an accurate search  
399 strategy (-mlacc 2 -spr 4 -slownni), and 100 bootstrap replicates.

400 **Probe design and CARD-FISH (Catalyzed reporter deposition fluorescence *in situ* hybridization):** All  
401 assembled 16S sequences classified as Asgardaeota were aligned with the SINA aligner<sup>63</sup>, manually  
402 optimized in ARB<sup>64</sup> using SILVA database SSURef\_NR99\_132<sup>35</sup>, and a RAxML tree (Randomized  
403 Accelerated Maximum Likelihood tree with GTR-GAMMA model, 100 bootstraps<sup>65</sup>) was constructed  
404 (**Supplementary Figure S7**). Probe design for Heimdallarchaea and Lokiarchaea based on almost  
405 full-length sequences of high quality was done with the probe\_design and probe\_check tools in ARB.  
406 Probes were tested *in silico*<sup>66</sup> and in the laboratory with different formamide concentrations in the  
407 hybridization buffer until stringent conditions were achieved (**Supplementary Table S8**). Sediment  
408 sampling was performed using a custom mud corer on 22 April 2018 at 12:00 in Tekirghiol Lake,  
409 Romania, (44°03.19017 N, 28°36.19083 E) and Amara Lake (44°36'N, 27°20'E, 23 April 2018, 14:00).  
410 Seven sediment layers (0-70 cm, in 10-cm ranges) were samples in Tekirghiol Lake and the top 10 cm  
411 was sampled in Amara Lake. Sediment samples were fixed with formaldehyde, treated with  
412 sonication, vortexing and centrifugation to detach cells from sediment particles<sup>67</sup> and aliquots were  
413 filtered onto white polycarbonate filters (0.2 µm pore size, Millipore). CARD-FISH was conducted as  
414 previously described with fluorescein labelled tyramides<sup>68</sup>. Filters were counterstained with DAPI  
415 and inspected by epifluorescence microscopy (Zeiss Imager.M1). Micrographs of CARD-FISH stained  
416 cells were recorded with a highly sensitive charge-coupled device (CCD) camera (Vosskühler) and cell  
417 sizes were estimated with the software LUCIA (Laboratory Imaging Prague, Czech Republic).

418 **Accession numbers:** All sequence data produced during the study is deposited in the Sequence Read  
419 Archive (SRA) database of the National Center for Biotechnology Information (NCBI) and can be  
420 found linked to the Bioproject PRJNA483005.

## 421 References

- 422 1. Rivera, M. C., Jain, R., Moore, J. E. & Lake, J. A. Genomic evidence for two functionally distinct  
423 gene classes. *Proc. Natl. Acad. Sci. U. S. A.* **95**, 6239–6244 (1998).  
424 2. McInerney, J. O., O'Connell, M. J. & Pisani, D. The hybrid nature of the Eukaryota and a

- 425 consilient view of life on Earth. *Nat. Rev. Microbiol.* **12**, 449 (2014).
- 426 3. de Duve, C. The origin of eukaryotes: a reappraisal. *Nature reviews. Genetics* **8**, 395–403  
427 (2007).
- 428 4. Eme, L., Spang, A., Lombard, J., Stairs, C. W. & Ettema, T. J. G. Archaea and the origin of  
429 eukaryotes. *Nat. Rev. Microbiol.* **15**, 711–723 (2017).
- 430 5. Martijn, J., Vosseberg, J., Guy, L., Offre, P. & Ettema, T. J. G. Deep mitochondrial origin  
431 outside the sampled alphaproteobacteria. *Nature* **557**, 101–105 (2018).
- 432 6. Zaremba-Niedzwiedzka, K. *et al.* Asgard archaea illuminate the origin of eukaryotic cellular  
433 complexity. *Nature* **541**, 353–358 (2017).
- 434 7. Sousa, F. L., Neukirchen, S., Allen, J. F., Lane, N. & Martin, W. F. Lokiarchaeon is hydrogen  
435 dependent. *Nat. Microbiol.* **1**, 16034 (2016).
- 436 8. Susko, E. & Roger, A. J. On reduced amino acid alphabets for phylogenetic inference. *Mol.*  
437 *Biol. Evol.* **24**, 2139–2150 (2007).
- 438 9. Spang, A. *et al.* Complex archaea that bridge the gap between prokaryotes and eukaryotes.  
439 *Nature* **521**, 173 (2015).
- 440 10. Liu, Y. *et al.* Comparative genomic inference suggests mixotrophic lifestyle for Thorarchaeota.  
441 *ISME J.* **12**, 1021–1031 (2018).
- 442 11. Dodding, M. P. Folliculin – A tumor suppressor at the intersection of metabolic signaling and  
443 membrane traffic. *Small GTPases* **8**, 100–105 (2017).
- 444 12. Pushkarev, A. *et al.* A distinct abundant group of microbial rhodopsins discovered using  
445 functional metagenomics. *Nature* **558**, 595–599 (2018).
- 446 13. Flores-Uribe, J. *et al.* Heliorhodopsins are absent in diderm (Gram-negative) bacteria: Some  
447 thoughts and possible implications for activity. *bioRxiv* (2018).
- 448 14. Petrovskaya, L. E. *et al.* Predicted bacteriorhodopsin from *Exiguobacterium sibiricum* is a  
449 functional proton pump. *FEBS Lett.* **584**, 4193–4196 (2010).
- 450 15. Alexe, M. *Studiul lacurilor sărate din Depresiunea Transilvaniei.* (Presa Universitară Clujeană,  
451 2010).
- 452 16. Ternes, C. M. & Schönknecht, G. Gene Transfers Shaped the Evolution of De Novo NAD(+)   
453 Biosynthesis in Eukaryotes. *Genome Biol. Evol.* **6**, 2335–2349 (2014).
- 454 17. Lin, H., Kwan, A. L. & Dutcher, S. K. Synthesizing and Salvaging NAD<sup>+</sup>: Lessons Learned from  
455 *Chlamydomonas reinhardtii*. *PLOS Genet.* **6**, e1001105 (2010).
- 456 18. Gazzaniga, F., Stebbins, R., Chang, S. Z., McPeck, M. A. & Brenner, C. Microbial NAD  
457 Metabolism: Lessons from Comparative Genomics. *Microbiol. Mol. Biol. Rev.* **73**, 529–541  
458 (2009).
- 459 19. Kurnasov, O. *et al.* Aerobic tryptophan degradation pathway in bacteria: novel kynurenine  
460 formamidase. *FEMS Microbiol. Lett.* **227**, 219–227 (2003).
- 461 20. Sawers, G., Heider, J., Zehelein, E. & Bock, A. Expression and operon structure of the sel genes  
462 of *Escherichia coli* and identification of a third selenium-containing formate dehydrogenase  
463 isoenzyme. *J. Bacteriol.* **173**, 4983–4993 (1991).
- 464 21. Abaibou, H., Pommier, J., Benoit, S., Giordano, G. & Mandrand-Berthelot, M. A. Expression  
465 and characterization of the *Escherichia coli* fdo locus and a possible physiological role for  
466 aerobic formate dehydrogenase. *J. Bacteriol.* **177**, 7141–7149 (1995).
- 467 22. Brasen, C., Esser, D., Rauch, B. & Siebers, B. Carbohydrate metabolism in Archaea: current  
468 insights into unusual enzymes and pathways and their regulation. *Microbiol. Mol. Biol. Rev.*  
469 **78**, 89–175 (2014).
- 470 23. Dorr, C., Zaparty, M., Tjaden, B., Brinkmann, H. & Siebers, B. The hexokinase of the  
471 hyperthermophile *Thermoproteus tenax*. ATP-dependent hexokinases and ADP-dependent  
472 glucokinases, two alternatives for glucose phosphorylation in Archaea. *J. Biol. Chem.* **278**,  
473 18744–18753 (2003).
- 474 24. Aono, R. *et al.* Enzymatic characterization of AMP phosphorylase and ribose-1,5-bisphosphate  
475 isomerase functioning in an archaeal AMP metabolic pathway. *J. Bacteriol.* **194**, 6847–6855

- 476 (2012).
- 477 25. Kono, T. *et al.* A RuBisCO-mediated carbon metabolic pathway in methanogenic archaea. *Nat.*  
478 *Commun.* **8**, 14007 (2017).
- 479 26. Techtmann, S. M. *et al.* Evidence for horizontal gene transfer of anaerobic carbon monoxide  
480 dehydrogenases. *Front. Microbiol.* **3**, 132 (2012).
- 481 27. Martin, W. F. Hydrogen, metals, bifurcating electrons, and proton gradients: The early  
482 evolution of biological energy conservation. *FEBS Lett.* **586**, 485–493 (2012).
- 483 28. Takami, H. *et al.* A Deeply Branching Thermophilic Bacterium with an Ancient Acetyl-CoA  
484 Pathway Dominates a Subsurface Ecosystem. *PLoS One* **7**, e30559 (2012).
- 485 29. Nicholls, P., Marshall, D. C., Cooper, C. E. & Wilson, M. T. Sulfide inhibition of and metabolism  
486 by cytochrome c oxidase. *Biochem. Soc. Trans.* **41**, 1312–1316 (2013).
- 487 30. Martin, W. F., Garg, S. & Zimorski, V. Endosymbiotic theories for eukaryote origin. *Philos.*  
488 *Trans. R. Soc. B Biol. Sci.* **370**, 20140330 (2015).
- 489 31. Martin, W. & Muller, M. The hydrogen hypothesis for the first eukaryote. *Nature* **392**, 37–41  
490 (1998).
- 491 32. Bushnell, B., Rood, J. & Singer, E. BBMerge - Accurate paired shotgun read merging via  
492 overlap. *PLoS One* **12**, e0185056 (2017).
- 493 33. Bushnell, B. BBMap short read aligner. *Univ. California, Berkeley, California.* URL  
494 <http://sourceforge.net/projects/bbmap> (2016).
- 495 34. Edgar, R. C. Search and clustering orders of magnitude faster than BLAST. *Bioinformatics* **26**,  
496 2460–2461 (2010).
- 497 35. Pruesse, E. *et al.* SILVA: a comprehensive online resource for quality checked and aligned  
498 ribosomal RNA sequence data compatible with ARB. *Nucleic Acids Res.* **35**, 7188–7196  
499 (2007).
- 500 36. Nawrocki, E. P. Structural RNA Homology Search and Alignment using Covariance Models.  
501 (Washington University School of Medicine, 2009).
- 502 37. Altschul, S. F., Gish, W., Miller, W., Myers, E. W. & Lipman, D. J. Basic local alignment search  
503 tool. *J. Mol. Biol.* **215**, 403–410 (1990).
- 504 38. Li, D., Liu, C.-M., Luo, R., Sadakane, K. & Lam, T.-W. MEGAHIT: an ultra-fast single-node  
505 solution for large and complex metagenomics assembly via succinct de Bruijn graph.  
506 *Bioinformatics* **31**, 1674–1676 (2015).
- 507 39. Hyatt, D., LoCascio, P. F., Hauser, L. J. & Uberbacher, E. C. Gene and translation initiation site  
508 prediction in metagenomic sequences. *Bioinformatics* **28**, 2223–2230 (2012).
- 509 40. Steinegger, M. & Söding, J. MMseqs2 enables sensitive protein sequence searching for the  
510 analysis of massive data sets. *Nat. Biotechnol.* **35**, 1026 (2017).
- 511 41. Kang, D. D., Froula, J., Egan, R. & Wang, Z. MetaBAT, an efficient tool for accurately  
512 reconstructing single genomes from complex microbial communities. *PeerJ* **3**, e1165 (2015).
- 513 42. Parks, D. H., Imelfort, M., Skennerton, C. T., Hugenholtz, P. & Tyson, G. W. CheckM: assessing  
514 the quality of microbial genomes recovered from isolates, single cells, and metagenomes.  
515 *Genome Res.* **25**, 1043–1055 (2015).
- 516 43. Seemann, T. Prokka: rapid prokaryotic genome annotation. *Bioinformatics* **30**, 2068–2069  
517 (2014).
- 518 44. Kanehisa, M., Sato, Y. & Morishima, K. BlastKOALA and GhostKOALA: KEGG Tools for  
519 Functional Characterization of Genome and Metagenome Sequences. *J. Mol. Biol.* **428**, 726–  
520 731 (2016).
- 521 45. Lowe, T. M. & Eddy, S. R. tRNAscan-SE: a program for improved detection of transfer RNA  
522 genes in genomic sequence. *Nucleic Acids Res.* **25**, 955–964 (1997).
- 523 46. Makarova, K. S., Wolf, Y. I. & Koonin, E. V. Archaeal Clusters of Orthologous Genes (arCOGs):  
524 An Update and Application for Analysis of Shared Features between Thermococcales,  
525 Methanococcales, and Methanobacteriales. *Life (Basel, Switzerland)* **5**, 818–840 (2015).
- 526 47. Jones, P. *et al.* InterProScan 5: genome-scale protein function classification. *Bioinformatics*

- 527 **30**, 1236–1240 (2014).
- 528 48. Finn, R. D. *et al.* HMMER web server: 2015 update. *Nucleic Acids Res.* **43**, W30-8 (2015).
- 529 49. Kelley, L. A., Mezulis, S., Yates, C. M., Wass, M. N. & Sternberg, M. J. E. The Phyre2 web portal  
530 for protein modeling, prediction and analysis. *Nat. Protoc.* **10**, 845–858 (2015).
- 531 50. Käll, L., Krogh, A. & Sonnhammer, E. L. L. Advantages of combined transmembrane topology  
532 and signal peptide prediction—the Phobius web server. *Nucleic Acids Res.* **35**, W429–W432  
533 (2007).
- 534 51. Loytynoja, A. Phylogeny-aware alignment with PRANK. *Methods Mol. Biol.* **1079**, 155–170  
535 (2014).
- 536 52. Criscuolo, A. & Gribaldo, S. BMGE (Block Mapping and Gathering with Entropy): a new  
537 software for selection of phylogenetic informative regions from multiple sequence  
538 alignments. *BMC Evol. Biol.* **10**, 210 (2010).
- 539 53. Hoang, D. T., Chernomor, O., von Haeseler, A., Minh, B. Q. & Vinh, L. S. UFBoot2: Improving  
540 the Ultrafast Bootstrap Approximation. *Mol. Biol. Evol.* **35**, 518–522 (2018).
- 541 54. Nguyen, L.-T., Schmidt, H. A., von Haeseler, A. & Minh, B. Q. IQ-TREE: A Fast and Effective  
542 Stochastic Algorithm for Estimating Maximum-Likelihood Phylogenies. *Mol. Biol. Evol.* **32**,  
543 268–274 (2015).
- 544 55. Lartillot, N., Rodrigue, N., Stubbs, D. & Richer, J. PhyloBayes MPI: phylogenetic reconstruction  
545 with infinite mixtures of profiles in a parallel environment. *Syst. Biol.* **62**, 611–615 (2013).
- 546 56. Notredame, C., Higgins, D. G. & Heringa, J. T-Coffee: A novel method for fast and accurate  
547 multiple sequence alignment. *J. Mol. Biol.* **302**, 205–217 (2000).
- 548 57. Edgar, R. C. MUSCLE: multiple sequence alignment with high accuracy and high throughput.  
549 *Nucleic Acids Res.* **32**, 1792–1797 (2004).
- 550 58. Tabita, F. R. *et al.* Function, structure, and evolution of the RubisCO-like proteins and their  
551 RubisCO homologs. *Microbiol. Mol. Biol. Rev.* **71**, 576–599 (2007).
- 552 59. Wrighton, K. C. *et al.* RubisCO of a nucleoside pathway known from Archaea is found in  
553 diverse uncultivated phyla in bacteria. *ISME J.* **10**, 2702–2714 (2016).
- 554 60. Castro-Fernandez, V. *et al.* Reconstructed ancestral enzymes reveal that negative selection  
555 drove the evolution of substrate specificity in ADP-dependent kinases. *J. Biol. Chem.* **292**,  
556 21218 (2017).
- 557 61. Katoh, K. MAFFT: a novel method for rapid multiple sequence alignment based on fast  
558 Fourier transform. *Nucleic Acids Res.* **30**, 3059–3066 (2002).
- 559 62. Price, M. N., Dehal, P. S. & Arkin, A. P. FastTree 2—approximately maximum-likelihood trees  
560 for large alignments. *PLoS One* **5**, e9490 (2010).
- 561 63. Pruesse, E., Peplies, J. & Glockner, F. O. SINA: accurate high-throughput multiple sequence  
562 alignment of ribosomal RNA genes. *Bioinformatics* **28**, 1823–1829 (2012).
- 563 64. Ludwig, W. *et al.* ARB: a software environment for sequence data. *Nucleic Acids Res.* **32**,  
564 1363–1371 (2004).
- 565 65. Stamatakis, A., Ludwig, T. & Meier, H. RAXML-II: a program for sequential, parallel and  
566 distributed inference of large phylogenetic trees. *Concurr. Comput. Pract. Exp.* **17**, 1705–1723  
567 (2005).
- 568 66. Yilmaz, L. S., Parnerkar, S. & Noguera, D. R. mathFISH, a web tool that uses thermodynamics-  
569 based mathematical models for in silico evaluation of oligonucleotide probes for fluorescence  
570 in situ hybridization. *Appl. Environ. Microbiol.* **77**, 1118–1122 (2011).
- 571 67. Ishii, K., Mussmann, M., MacGregor, B. J. & Amann, R. An improved fluorescence in situ  
572 hybridization protocol for the identification of bacteria and archaea in marine sediments.  
573 *FEMS Microbiol. Ecol.* **50**, 203–213 (2004).
- 574 68. Pernthaler, A., Pernthaler, J. & Amann, R. Fluorescence in situ hybridization and catalyzed  
575 reporter deposition for the identification of marine bacteria. *Appl. Environ. Microbiol.* **68**,  
576 3094–3101 (2002).
- 577

578

579 **End notes.**

580

581 **Acknowledgements**

582 We are thankful to: Z. Keresztes, V. Muntean, M. Alexe, A. Cristea, and A. Baricz for their technical  
583 support during sampling and sample preparation. The contribution of E. A. Levei and M. Senila in  
584 performing chemical analysis is kindly acknowledged. P-A.B was supported by the research grant PN-  
585 III-P4-ID-PCE-2016-0303 (Romanian National Authority for Scientific Research). H.B.L. was supported  
586 by the research grants: PN-III-P4-ID-PCE-2016-0303 (Romanian National Authority for Scientific  
587 Research) and STAR-UBB Advanced Fellowship-Intern (Babeş-Bolyai University). A-Ş.A. was  
588 supported by the research grants: 17-04828S (Grant Agency of the Czech Republic) and  
589 MSM200961801 (Academy of Sciences of the Czech Republic). M.M. was supported by the  
590 Postdoctoral program PPPLZ (Academy of Sciences of the Czech Republic).R.G. was supported by the  
591 research grant 17-04828S (Grant Agency of the Czech Republic).

592

593 **Contributions**

594 H.L.B. and P-A.B. designed the study. P-A.B., A-Ş.A. and R.G. wrote the manuscript. P-A.B., A-Ş.A.,  
595 R.G., M.M.S and M.M. analyzed and interpreted the data. O.B., K.I. and H.K. performed rhodopsin  
596 data analyses. M.M.S. did CARD-FISH imaging. All authors commented on and approved the  
597 manuscript.

598

599 **Competing interests**

600 The authors declare no competing interests.

601

602

603



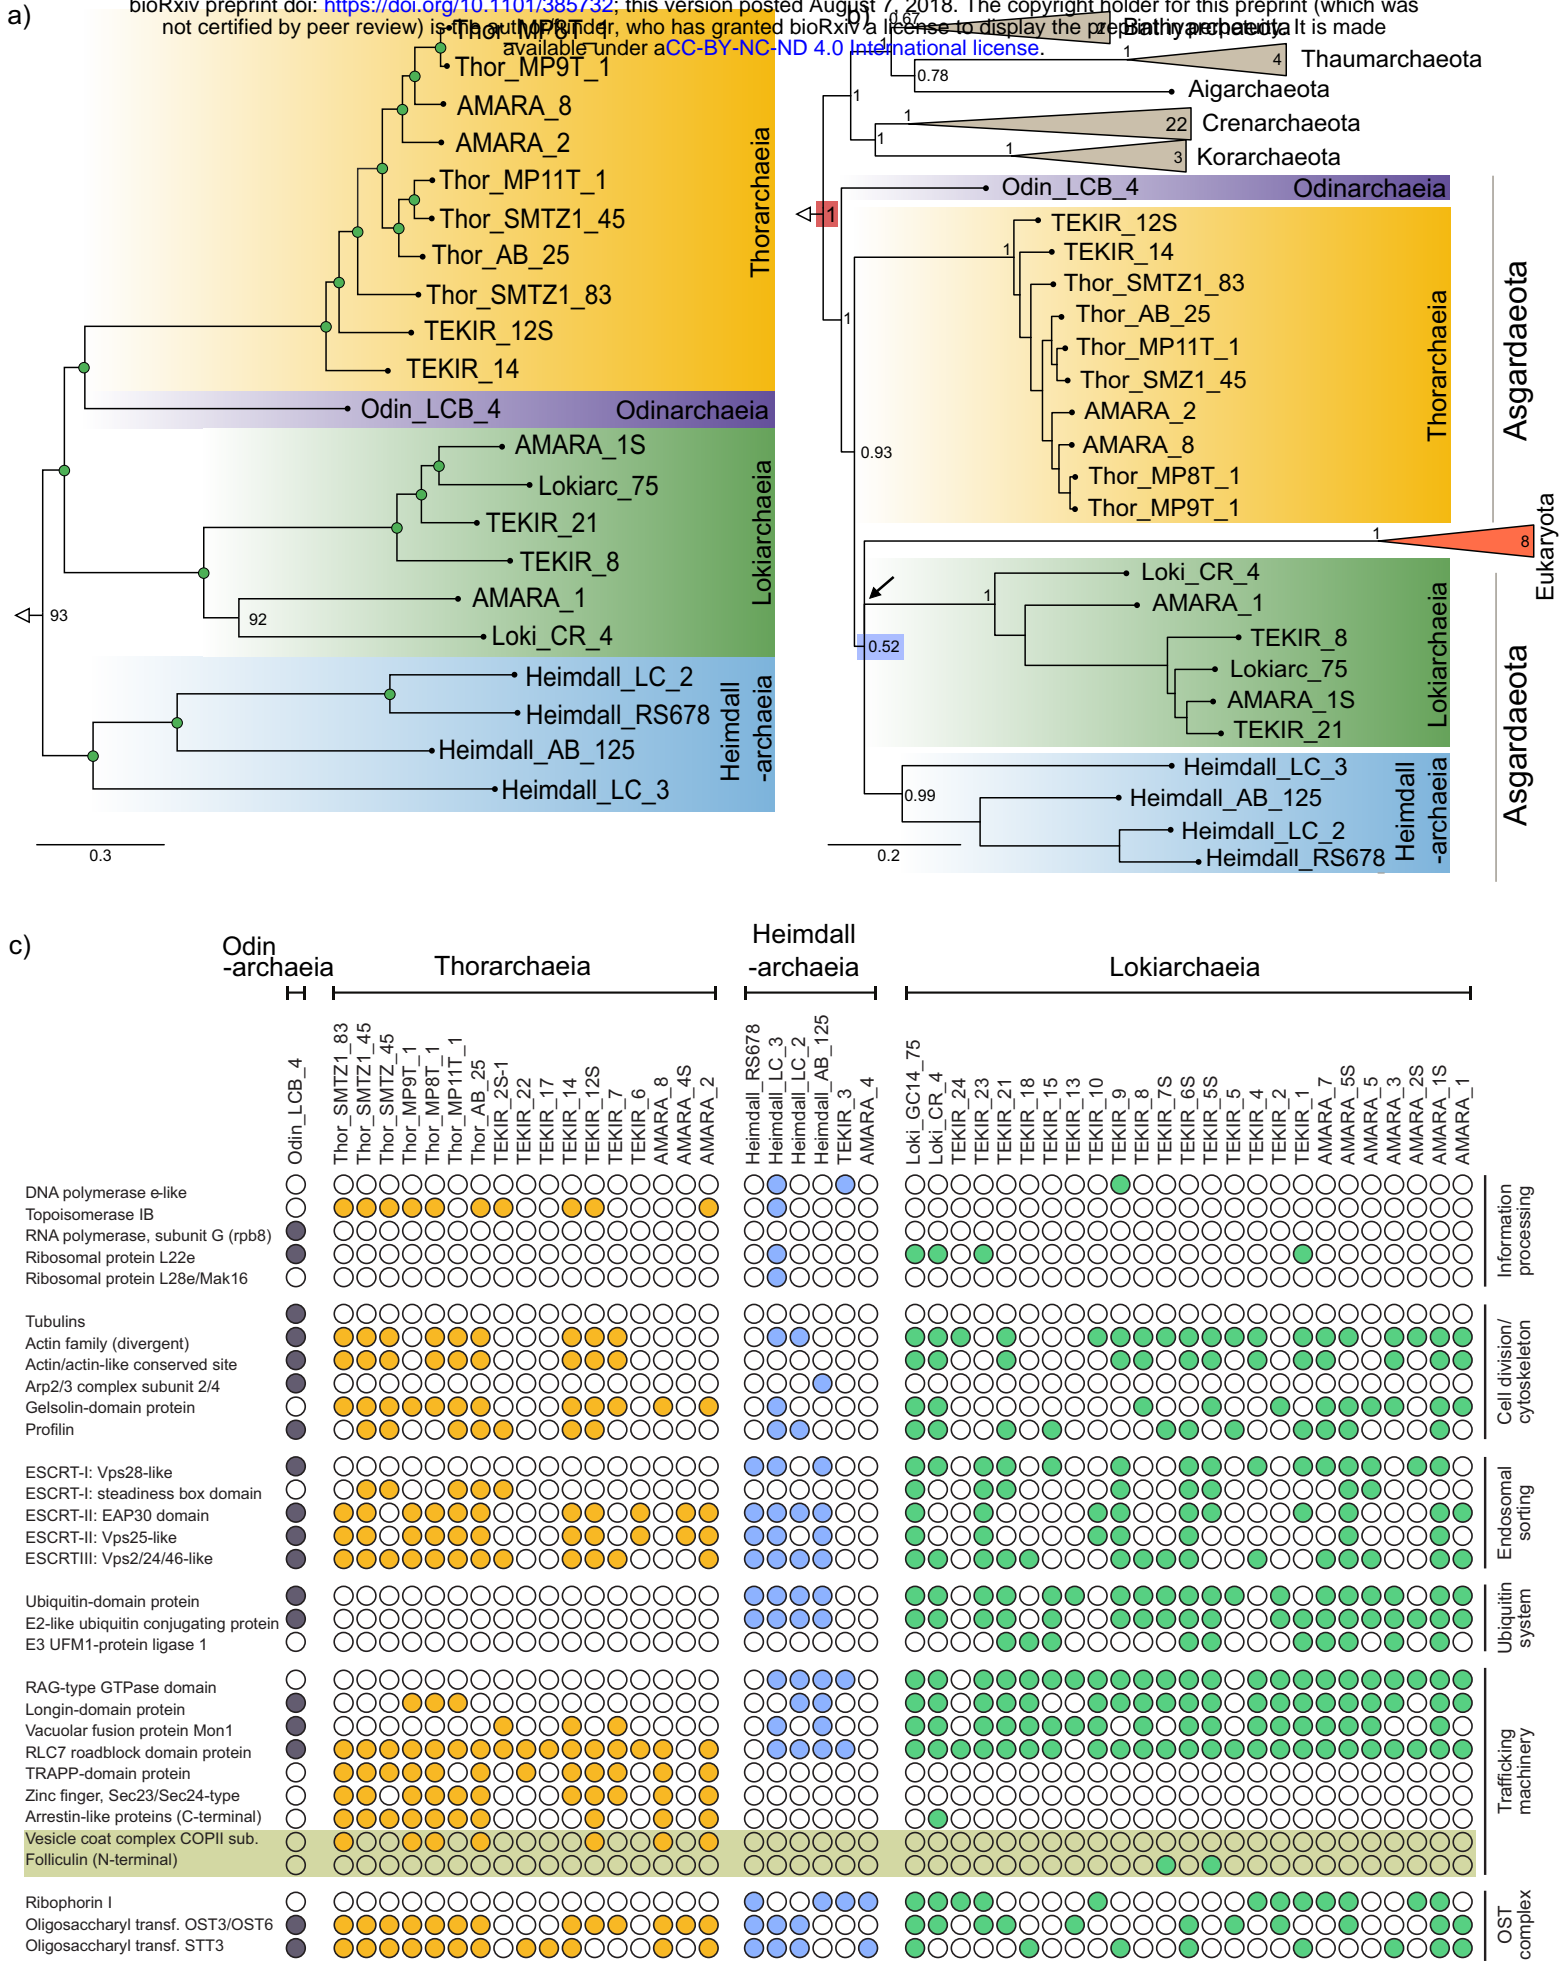

**Figure 1.** Asgardaeota phylogenomics. **a)** Maximum-likelihood phylogeny of Asgardaeota superphylum. The green circles highlight UFBoot values higher than 95. **b)** Asgardaeota phylogeny generated through Bayesian inference. The posterior probability values are shown above the internal nodes. High support for Eukaryota/Asgardaeota monophyly, and the low support for Eukaryota/Heimdallarchaeia association is indicated by red and blue rectangles on the nodes respectively. The black arrow indicates the unresolved position of Lokiarchaeia. Scale bars indicate the number of substitutions per site. Panel (c) provides a census of the eukaryotic signature proteins (ESP) found in the recovered MAGs. The grey box highlights new ESP identified during this study.

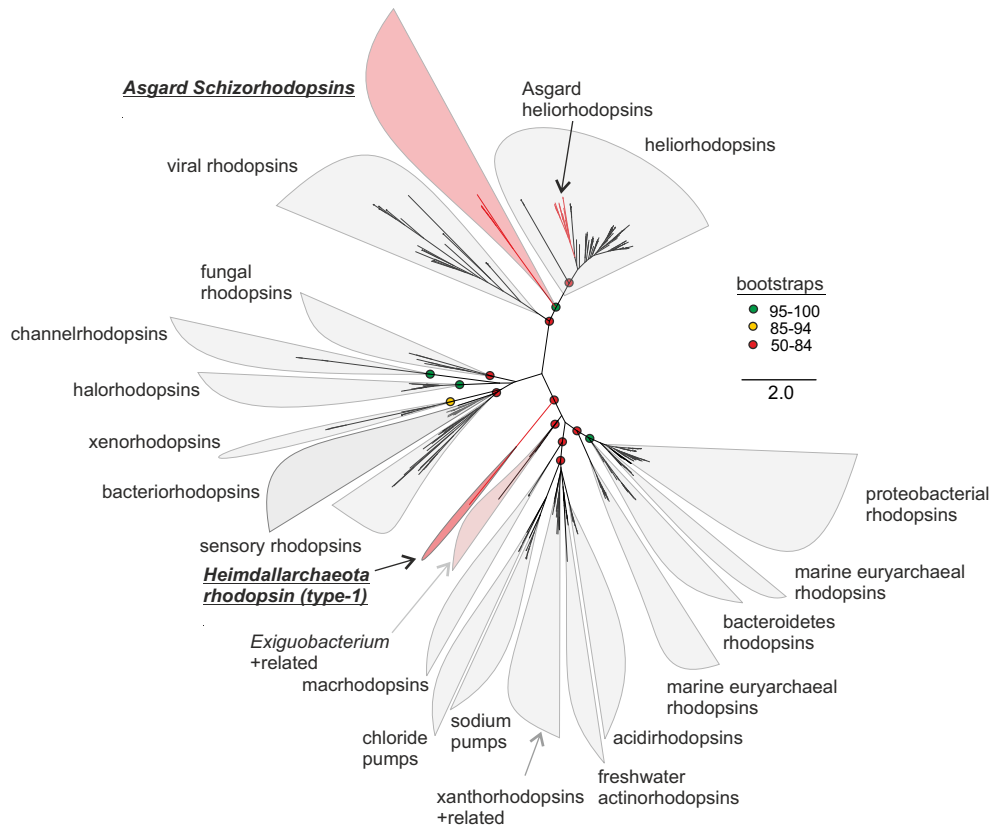

**Figure 2.** Phylogenetic analysis of rhodopsins. An unrooted maximum-likelihood tree of all Asgardaeota schizorhodopsins identified in this work, heliorhodopsins and representative known type-1 rhodopsins, is shown. The branches colored red are sequences from the Asgardaeota. Bootstrap values on nodes are indicated by colored circles (see color key at the right).

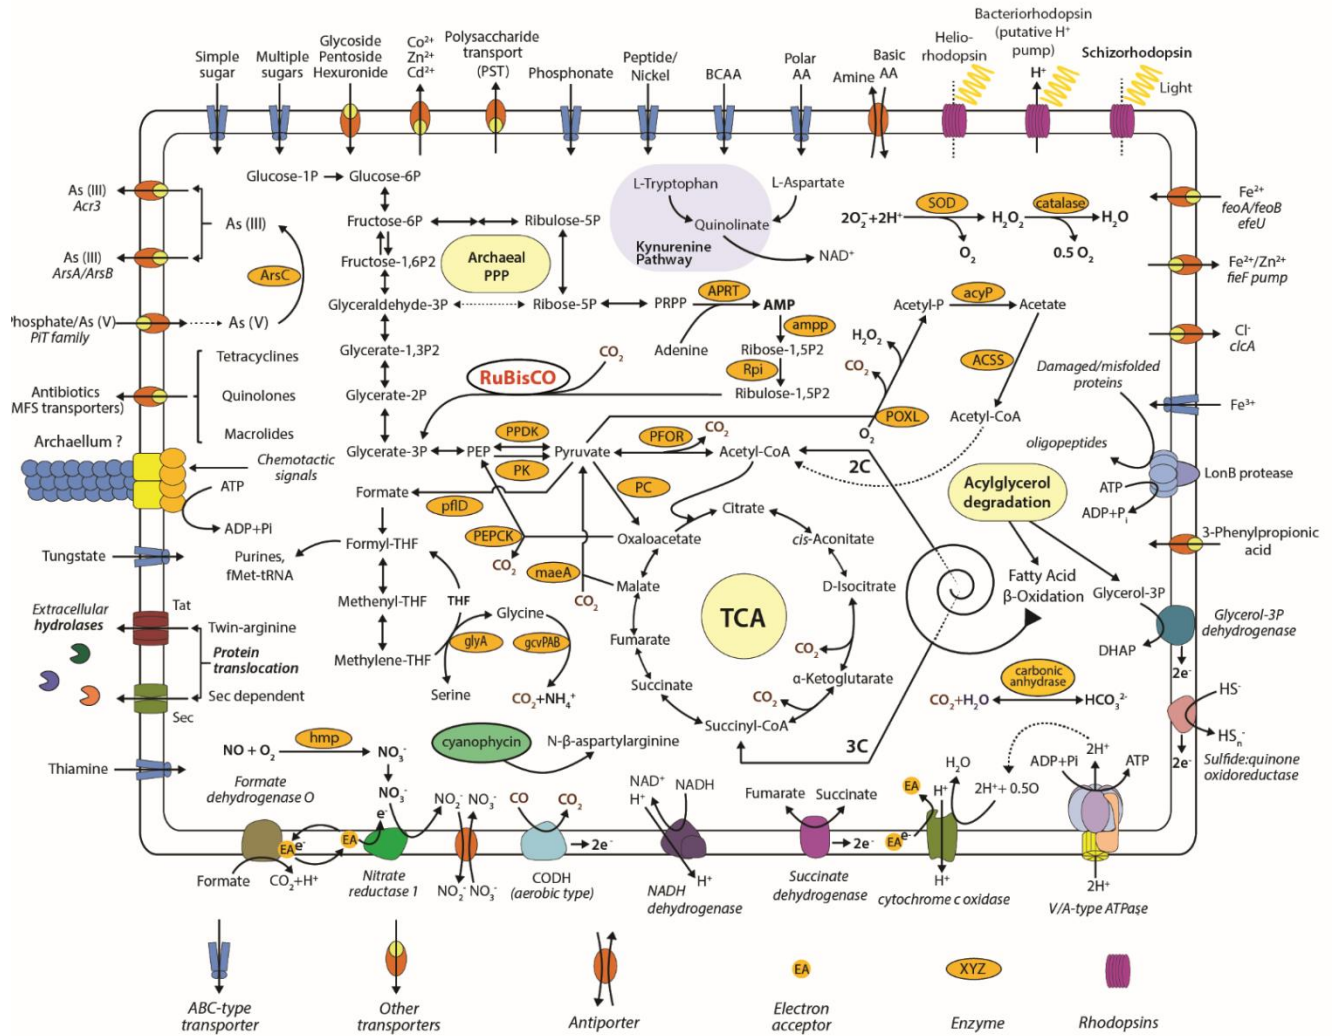

**Figure 3.** Metabolic reconstruction of Heimdallarchaea. The text present in the yellow panels depicts names of pathways and metabolic processes. Abbreviations: ArsC - arsenate reductase (glutaredoxin); hmp - nitric oxide dioxygenase; PPK - pyruvate, phosphate dikinase; PK - pyruvate kinase; PEPCK - phosphoenolpyruvate carboxykinase; maeA - malate dehydrogenase (decarboxylating); glyA - glycine hydroxymethyltransferase; gcvPAB - glycine dehydrogenase; PFOR - pyruvate ferredoxin oxidoreductase; APRT - AMP pyrophosphorylase; ampp - AMP phosphorylase; Rpi - ribose-5-phosphate isomerase; SOD – superoxide dismutase; catalase; acyP - acylphosphatase; poxL - pyruvate oxidase; ACSS - acetyl-CoA synthetase and carbonic anhydrase. RuBisCO - Ribulose-1,5-bisphosphate carboxylase/oxygenase is shown in red.

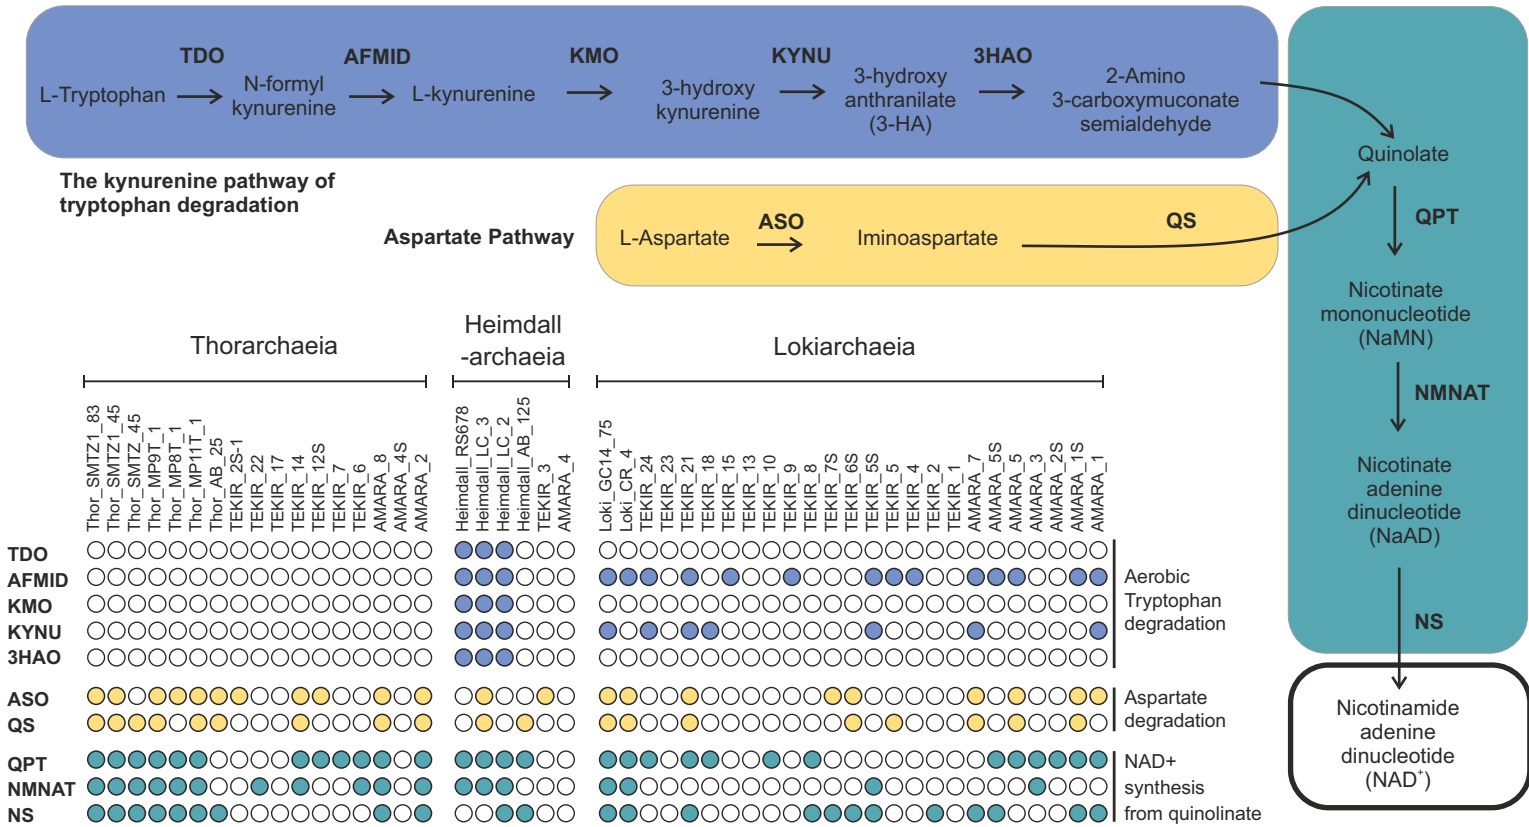

**Figure 4.** *De novo* NAD<sup>+</sup> synthesis pathways. The colored boxes show a schematic representation of the kynurenine and aspartate pathways involved in *de novo* NAD<sup>+</sup> synthesis. The presence of the enzymes involved in these pathways is indicated for each MAG by using a colored circle. TDO - tryptophan 2,3-dioxygenase; AFMID – arylformamidase; KMO - kynurenine 3-monooxygenase; KYNU – kynureninase; 3HAO - 3-hydroxyanthranilate 3,4-dioxygenase; ASO - L-aspartate oxidase; QS - quinolinate synthase; QPT - nicotinate-nucleotide pyrophosphorylase; NMNAT - nicotinamide-nucleotide adenylyltransferase; NS - NAD<sup>+</sup> synthase

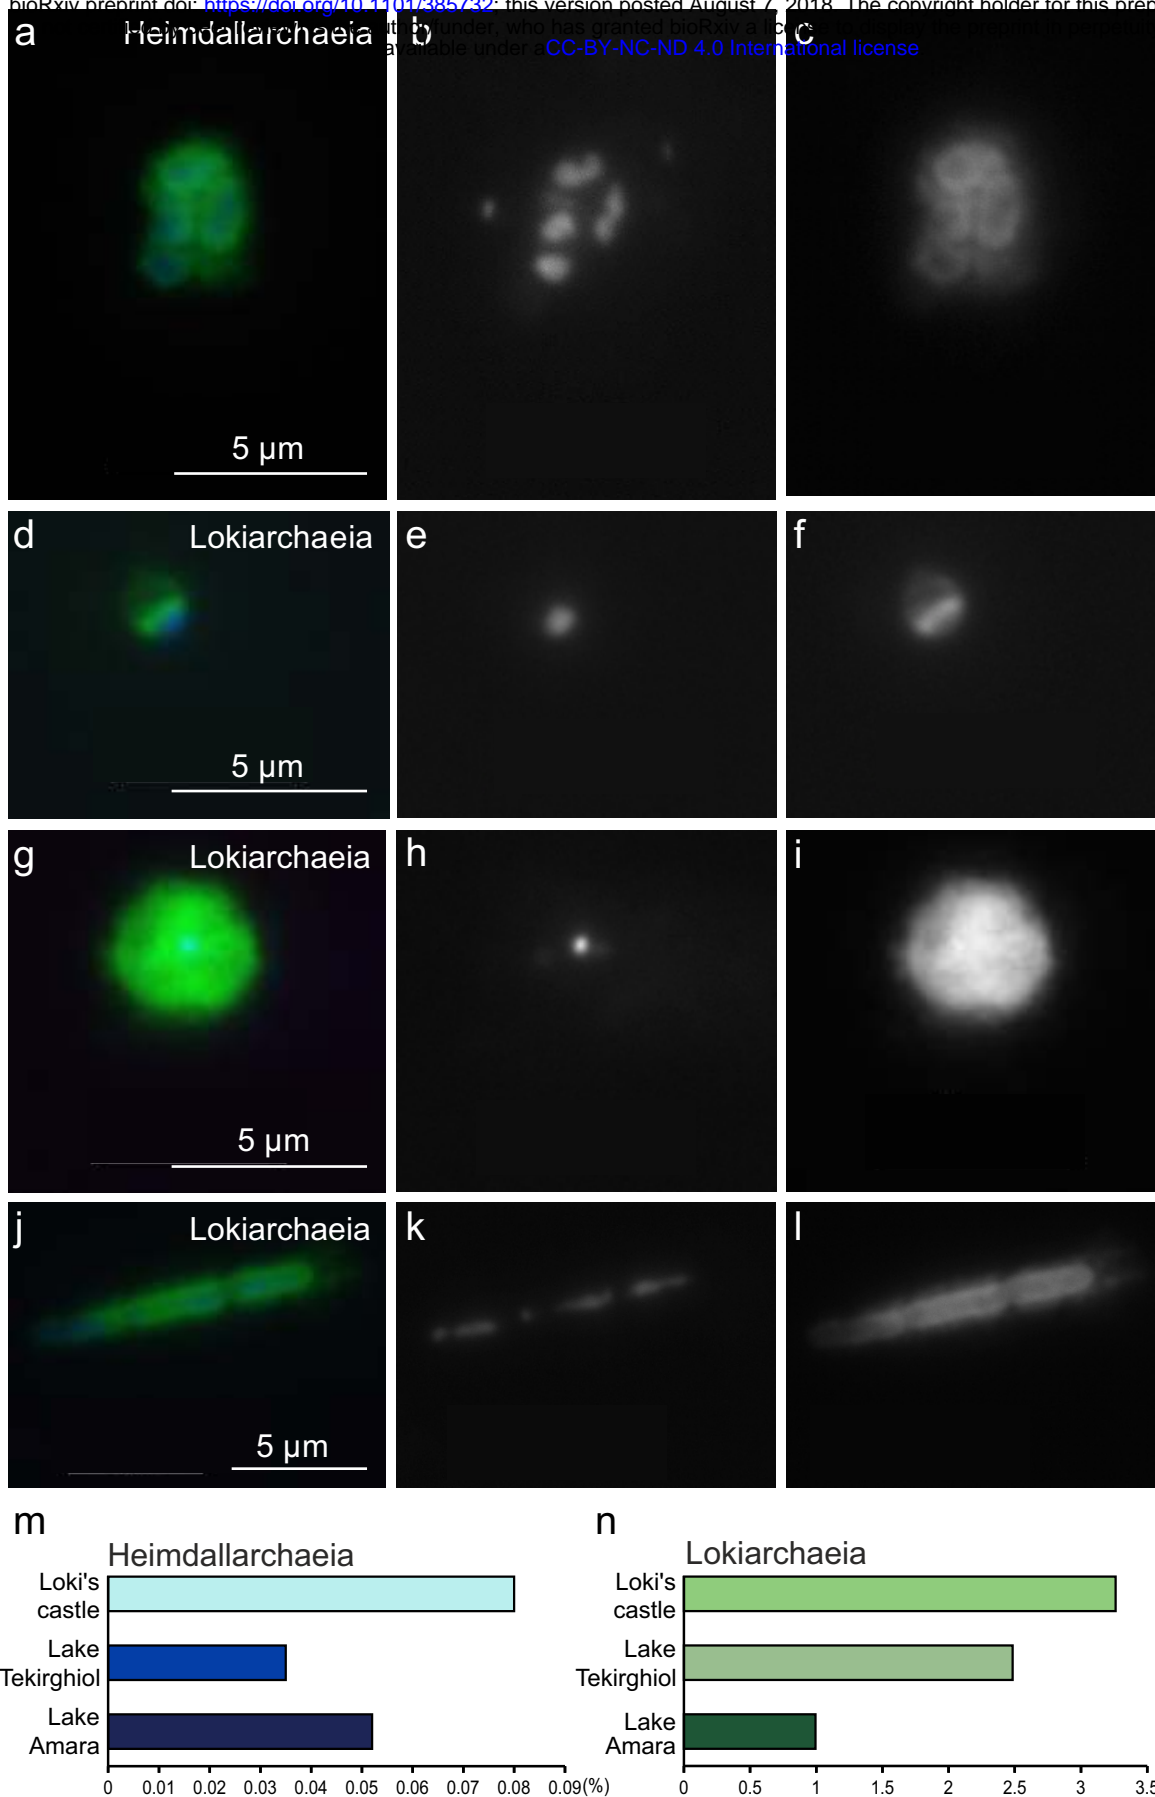

**Figure 5.** CARD-FISH imaging of Heimdallarchaeia and Lokiarchaeia. The upper panel (a-c) shows several cells of Heimdallarchaeia hybridized with probe heimdall-526, the lower three panels (d-l) diverse morphologies of Lokiarchaeia targeted by probe loki1-1184. The left panels (a, d, g, j) display overlay images of probe signal (green), DAPI staining (blue) and autofluorescence (red), the middle panels (b, e, h, k) DAPI staining of DNA, the right panels (c, f, i, l) CARD-FISH staining of proteins. Abundance estimation of recovered 16S rRNA reads affiliated with Heimdallarchaeia (m) and Lokiarchaeia (n) within metagenomes from Loki's castle, Lake Tekirghiol, and Lake Amara.



1 **Supplementary Information**

2

3 **The sunlit microoxic niche of the archaeal eukaryotic ancestor comes**  
4 **to light**

5

6 Paul-Adrian Bulzu<sup>1#</sup>, Adrian-Ştefan Andrei<sup>2#</sup>, Michaela M. Salcher<sup>3</sup>, Maliheh Mehrshad<sup>2</sup>,  
7 Keiichi Inoue<sup>5</sup>, Hideki Kandori<sup>6</sup>, Oded Beja<sup>4</sup>, Rohit Ghai<sup>2\*</sup>, Horia L. Banciu<sup>1</sup>

8 <sup>1</sup>Department of Molecular Biology and Biotechnology, Faculty of Biology and Geology, Babeş-Bolyai  
9 University, Cluj-Napoca, Romania.

10 <sup>2</sup>Institute of Hydrobiology, Department of Aquatic Microbial Ecology, Biology Centre of the Academy  
11 of Sciences of the Czech Republic, České Budějovice, Czech Republic.

12 <sup>3</sup>Limnological Station, Institute of Plant and Microbial Biology, University of Zurich, Seestrasse 187,  
13 CH-8802 Kilchberg, Switzerland.

14 <sup>4</sup>Faculty of Biology, Technion Israel Institute of Technology, Haifa, Israel.

15 <sup>5</sup>The Institute for Solid State Physics, The University of Tokyo, Kashiwa, Japan

16 <sup>6</sup>Department of Life Science and Applied Chemistry, Nagoya Institute of Technology, Nagoya, Japan.

17

18

19

20

21

22 # These authors contributed equally to this work

23 \*Corresponding author: Rohit Ghai

24 Institute of Hydrobiology, Department of Aquatic Microbial Ecology, Biology Centre of the Academy  
25 of Sciences of the Czech Republic, Na Sádkách 7, 370 05, České Budějovice, Czech Republic.

26 Phone: +420 387 775 881

27 Fax: +420 385 310 248

28 E-mail: [ghai.rohit@gmail.com](mailto:ghai.rohit@gmail.com)

29

30

31

32

### 33 **Supplementary Methods and Discussion**

34 **Sampling sites:** Amara and Tekirghiol are naturally-formed shallow lakes, located in the South-  
35 Eastern Romania, that harbour large deposits of organic-rich sediments (or 'sapropels'). Amara Lake  
36 (44°36'N, 27°20'E; 32 m a.s.l.; 1.3 km<sup>2</sup> area; maximum and average depths of 6 m and 2 m  
37 respectively) is an oxbow lake with brackish water, originating from an early meander of the Ialomița  
38 river (Romanian Plain) supposedly at the end of the Neolithic Black Sea transgression (ca. 3000 BC)<sup>2</sup>.  
39 Tekirghiol Lake (44°03'N, 28°36'E; 0.8 m a.s.l.; 11.6 km<sup>2</sup> area; maximum and average depths of 9 m  
40 and 3 m respectively) is a saline coastal lake derived from a marine lagoon which was isolated from  
41 the Black Sea by a narrow (~200 m wide) sand barrier, most probably during Phanagorian Black Sea  
42 regression (ca. 500-700 BC)<sup>1</sup>.

43 **Sediment chemical analyses:** The leachable major ions were water-extracted using a sediment-to-  
44 (milli-Q)water ratio of 1:10 at room temperature. The suspension was centrifuged and the  
45 supernatant was filtered through 0.22 μm-pore sized membranes. The obtained filtrate was further  
46 analyzed for ion content (**Supplementary Table S9**). Cations (Na<sup>+</sup>, K<sup>+</sup>, Mg<sup>2+</sup>) were measured by  
47 inductively coupled plasma atomic emission spectrometry (ICP-AES) using Optima 5300DV  
48 spectrometer (Perkin Elmer, USA). Chloride (Cl<sup>-</sup>) ions were measured by titrimetric method. Sulfate  
49 (SO<sub>4</sub><sup>2-</sup>) was assessed by ion chromatography on ICS-1500 (Dionex, Sunnyvale, CA, USA). The analysis  
50 of salt contents of Tekirghiol and Amara sediments indicated that dominant cations and anions were  
51 (g · Kg<sup>-1</sup>): Na<sup>+</sup> (16.5 and 7.0), K<sup>+</sup> (1.0 and 0.22), Mg<sup>2+</sup> (1.1 and 4.0), Cl<sup>-</sup> (27.7 and 11.2) and SO<sub>4</sub><sup>2-</sup> (0.25  
52 and 13.2). All chemical analyses were performed by E.A. Levei and M. Șenilă at INCDO-INOE 2000 -  
53 Research Institute for Analytical Instrumentation (Cluj-Napoca, Romania).

54 **Phylogenomics:** The phylogenomic trees (**Figure 1a, b**) showed that the basal branches of  
55 Thorarchaeia were represented by MAGs recovered from the Tekirghiol hypersaline sediment (i.e.  
56 TEKIR\_14 and TEKIR\_12S). The other ones were shown to form a compact cluster (n= 8), which  
57 appeared to be the outcome of a more recent diversification event (as assessed by short branch  
58 lengths) in brackish environments. Thus, the two brackish Amara MAGs (AMARA\_2 and AMARA\_8)  
59 clustered together with the: estuarine Mai Po ones (MP8T\_1, MP9T\_1 and MP11T\_1)<sup>3</sup>, Baltic Sea  
60 AB\_25<sup>4</sup> and the White Oak River Estuary SMTZ1\_45<sup>4</sup>; forming a genus-level clade (as assessed by  
61 amino acid identity values). Noteworthy, this reduced phylogenomic diversity within Thorarchaeia  
62 contrasts with the highly divergent MAGs of Loki- and Heimdallarchaeia, with which it shares  
63 common ancestry (**Figure 1a, b**). The presence of the younger RuBisCO type (i.e. IV)<sup>5</sup>  
64 (**Supplementary Figure S5**) in Thorarchaeia supports the '(more)recent diversification', as the other  
65 Asgardaeota (sampled to date) still maintain the ancestral type III (**Supplementary Figure S5**).

66 **Rhodopsins:** The recently discovered heliorhodopsins (HeR) were reported to be present in  
67 Heimdallarchaeia<sup>6</sup>. HeR share low sequence similarities with all known type-1 rhodopsins, and even  
68 more remarkably they are oriented in an opposite topology in the membrane, harbouring a  
69 cytoplasmic N-terminus (in contrast type-1 rhodopsins possess extracellular N-terminus).  
70 Heimdallarchaeia appear to possess the most diverse collection of rhodopsins within the  
71 Asgardaeota superphylum at large: type-1, HeR and schizorhodopsins. In contrast Loki- and  
72 Thorarchaeia were found to contain only schizorhodopsins (SzR). Lokiarchaeia was found to harbour  
73 sequences that have a helix-turn-helix motif and which are similar to bacterioopsin-activator like  
74 proteins. These proteins, which were found to be in the proximity of the SzR (**Supplementary Figure**  
75 **S6**) have been previously characterised in *Halobacterium halobium*, where they are hypothesized to  
76 work as low oxygen sensors capable of activating the bacteriorhodopsin gene<sup>7</sup>. However, given the  
77 absence of the sensing N-terminal domain (NifL-like), the connection between the bacterioopsin-  
78 activator like proteins and SzR is unclear. Although, the presence of Asgardaeota in habitats with  
79 light exposure possibility (e.g. lake water column, estuarine sediments, mangrove sediments,

80 microbial mats, etc.)<sup>3,4</sup> fulfils the condition needed for rhodopsin usage, further experimental data is  
81 needed to clarify the functions of these newly described proteins.

82 **Metabolism:** We observed that while all Asgardaeota clades (i.e. Thor-, Loki- and Heimdallarchaeia)  
83 possess transporters for the uptake of organic compounds, their preferences towards their  
84 categories show phyla specificity. We found that the genomic repertoire of Lokiarchaeia is highly  
85 enriched (up to ten times in comparison to rest of Asgardaeota) in genes encoding for the uptake of  
86 modified monosaccharides. Thus, Lokiarchaeia had 5.85 transporters/Mb for the  
87 glycoside/pentoside/hexuronide symporters, while Thor- and Heimdallarchaeia barely reached 0.66  
88 and respectively 0.52 transporters/Mb. We reason that this high genomic density is linked to the  
89 Lokiarchaeia's inferred capacity to degrade cellulose (by employing the synergic action of:  
90 endoglucanases, beta-glucosidases and cellobiose phosphorylases), and to import the resulted  
91 monosaccharides into the cytosol. The newly available monosaccharides could be used to fuel the  
92 cell machinery (by transformation of glucose to acetyl-CoA or lactate with subsequent ATP  
93 production), or transformed into glycogen storage for later usage (through glycogen/starch  
94 synthases, 1,4-alpha-glucan branching enzymes; starch/glycogen phosphorylases, alpha-amylases,  
95 neopullulanases). Peptide/nickel transporters were found to have a higher density in Thorarchaeia  
96 (Thor-: 2.48 transporters/Mb; Heimdall-: 0.79 transporters/Mb; Lokiarchaeia: 0.51 transporters/Mb).  
97 As previously reported in Thor-<sup>3,6</sup>, we found that both Loki- and Heimdallarchaeia have the  
98 mechanisms involved in peptide and amino-acid uptake, as well as the enzymatic repertoire needed  
99 for their degradation to keto-acids and acetyl-CoA (endopeptidases: PepB, PepD, PepP and PepT;  
100 aminotransferases: AspB, ArgD, IlvE, GlmS, HisC and PuuE; glutamate dehydrogenases  
101 oxidoreductases). Among Asgardaeota, Thorarchaeia was the only phylum in which we found the  
102 glucarate and dicarboxylate uptake systems, as well as the metabolic pathways needed to catabolize  
103 putrescine to succinate. Inorganic phosphate uptake could be achieved by all Asgardaeota through  
104 the usage of PiT family transporters. Lokiarchaeia was found to harbor the PhoR-PhoB two  
105 component system involved in phosphate uptake regulation, while Heimdallarchaeia (i.e. LC\_2 and  
106 RS678) was found to encode ABC-type transporters for phosphonates: refractory forms of  
107 phosphorus found to be highly abundant in marine systems<sup>7</sup>.

108 Sulfur uptake can be accounted for by the presence of sulphate permease SulP in Loki- and  
109 Thorarchaeia, as well as the ABC-type sulfonate/nitrate/taurine transport system, predominantly in  
110 the latter. Cysteine may also serve as a source of sulfur which can be mobilized by cysteine  
111 desulfurases in all three Asgardaeota phyla.

112 Remarkably, two Heimdallarchaeia MAGs (LC\_2 and LC\_3) encoded genes for the synthesis and  
113 degradation of cyanophycin (**Figure 3**), a non-ribosomally produced polypeptide used as a carbon  
114 and nitrogen storage pool in bacteria<sup>8</sup>.

115 While a canonical pentose phosphate pathway (PPP) is lacking in all analyzed Asgardaeota, evidence  
116 indicates that simple sugar interconversions are carried out by the non-oxidative branch of this  
117 pathway. In Thorarchaeia, the xylulose part of the non-oxidative branch was found to be largely  
118 complete with the key enzyme transketolase present in multiple MAGs. We also identified two  
119 copies of this enzyme in Heimdall\_RS678, which points towards similar functional capabilities;  
120 however, with low support within the Heimdallarchaeia phylum itself. The absence of transketolase  
121 enzyme, in Loki- as well as in most Heimdallarchaeia, and the presence of components of the  
122 Ribulose Monophosphate Pathway (RuMP) indicates it as a potential alternative for PPP, as  
123 previously reported in the case of *Thermococcus kodakaraensis*<sup>9</sup>. The presence of uridine  
124 phosphorylase within all three analyzed phyla indicates that the nucleotide degradation pathways  
125 could serve as an additional ribose source. While all analyzed Asgardaeota phyla encode  
126 components of the glycolytic pathway (i.e. type Embden-Meyerhof-Parnas), three Heimdallarchaeia  
127 MAGs (LC\_3, AB\_125 and AMARA\_4) were found to employ non-canonical ADP-dependent kinases

128 and, as previously noted<sup>3</sup>, no glucokinase homologue could be identified in Thorarchaeia. We reason  
129 that the well represented non-oxidative PPP in this group could either represent an alternative point  
130 of entry for sugars in the EMP, or that the function of canonical glucokinase is achieved by yet  
131 unidentified archaea-specific sugar kinases<sup>10</sup>.

132 Regarding pyruvate metabolism, in both Loki- and Thorarchaeia phosphoenolpyruvate (PEP) can be  
133 converted to pyruvate by phosphoenolpyruvate synthase (pps) as well as pyruvate kinase (pyk), the  
134 latter of which we identified in Heimdallarchaeia as well. Also present in all three phyla, malic  
135 enzyme (maeA) is probably responsible for catalyzing the oxidative decarboxylation of malate to  
136 pyruvate, CO<sub>2</sub> and NADH. Additionally, all groups encode pyruvate phosphate dikinase (PPDK), a PPI-  
137 utilizing enzyme which interconverts PEP and pyruvate. Among the anaplerotic reactions for CO<sub>2</sub>  
138 fixation, reversible carboxylation of acetyl-CoA to pyruvate may be achieved in all groups by the  
139 activity of pyruvate:ferredoxin oxidoreductase (PFOR). PEP can be synthesized by the  
140 phosphoenolpyruvate carboxykinases (PEPCK) present in all three groups, starting from  
141 oxaloacetate. Therefore, under gluconeogenic conditions, maeA and/or PEPCK, in combination with  
142 pps/PPDK, is used for directing C4 carbon intermediates from the TCA cycle, when present, to PEP<sup>11</sup> -  
143 the precursor for gluconeogenesis. Noteworthy, as a hint of potential aerobiosis, we identified  
144 exclusively in Heimdallarchaeia MAGs (LC2 and LC3) genes encoding for pyruvate oxidase (poxL),  
145 which catalyzes the decarboxylation of pyruvate in the presence of phosphate and oxygen, yielding  
146 carbon dioxide, hydrogen peroxide and acetyl phosphate<sup>12</sup>.

147 Among all analyzed phyla, the complete TCA cycle was identified in Loki- and Heimdallarchaeia.  
148 Inquiringly, genomes from all three phyla, with the exception of Heimdall LC\_3, were found to lack  
149 the membrane anchoring subunits of succinate dehydrogenase (sdhC, sdhD), while Lokiarchaeia  
150 contain key genes (isocitrate dehydrogenase, 2-oxoglutarate-ferredoxin oxidoreductase, ATP-citrate  
151 lyase) that are indicative of a reductive TCA cycle, involved in the autotrophic fixation of CO<sub>2</sub>. Also,  
152 malate dehydrogenase (MDH) was identified in Loki- and Thorarchaeia only by homology search  
153 (COG2055) and 3-dimensional structure predictions<sup>13</sup>.

154 Through analyzing new Asgardaeota genomes, we confirm previous findings<sup>3,14</sup> regarding the  
155 presence of a complete Wood-Ljungdahl pathway in both Loki- and Thorarchaeia. This pathway was  
156 found absent in the partial TEKIR\_3 and AMARA\_4 (13 and respectively 30% CheckM<sup>15</sup> estimated  
157 completeness) MAGs, as well as in the previously published (AB\_125, LC\_2, LC\_3, RS678)  
158 Heimdallarchaeia ones. Importantly, the Wood-Ljungdahl pathway is confined to anoxic niches  
159 harboring low reducing substrates such as carbon monoxide (CO) and H<sub>2</sub><sup>16,17</sup>. In spite of the fact that  
160 in anaerobic as well as aerobic microbes, CO may be used as both energy and carbon source<sup>18</sup>, the  
161 ability to utilize CO is conditioned by the presence of enzyme complexes known as carbon monoxide  
162 dehydrogenases (CODHs)<sup>19</sup>. In Heimdallarchaeia, we identified all three major subunits of the  
163 aerobic type CODH (coxSML). In this case, electrons generated from CO oxidation may be shuttled to  
164 oxygen or nitrate, which may serve as final electron acceptors<sup>20-22</sup>. However we observe that Thor-  
165 and Lokiarchaeia encode all components of the bifunctional and oxygen-sensitive<sup>23</sup> enzyme complex  
166 known as carbon monoxide dehydrogenase/acetyl-CoA synthase (CODH/ACS). This complex is part  
167 of the Wood-Ljungdahl pathway and is responsible for catalyzing reactions involved in autotrophic  
168 fixation of CO<sub>2</sub>.

169 Regarding oxidative phosphorylation, while V/A-type ATPase appears mostly complete in Loki- and  
170 Thorarchaeia, the other components involved in oxidative phosphorylation (the electron transport  
171 chain), are missing or incomplete, emphasizing anaerobic lifestyles. For Heimdallarchaeia we could  
172 identify complete V/A-type ATPase, succinate dehydrogenase, almost complete NADH:quinone  
173 oxidoreductase and importantly – cytochrome c oxidase – another hallmark of aerobiosis.

174 Uniquely among known Archaea, we identify all components of the aerobic tryptophan degradation  
175 pathway (i.e. kynurenine pathway<sup>24</sup>) in three published Heimdallarchaeia genomes (LC\_2, LC\_3,

176 RS678). The performed evolutionary history inferences indicated that the kynurenine pathway was  
177 probably acquired by Heimdallarchaeia through lateral gene transfer from bacteria (**Supplementary**  
178 **Figure S3**). The phylogenetic trees, constructed with key enzymes of the pathway, pointed towards  
179 enzyme-specific evolutionary rates (**Supplementary Figure S3**). Thus, while Heimdallarchaeia MAGs  
180 formed monophyletic clusters in the dioxygenases trees (TDO, HAAO), in the kynurenine  
181 monooxygenase (KMO) one they segregated into two independent clusters. The MAG  
182 Heimdall\_LC\_3 showed an affinity to cluster with a sediment-dwelling Bacteroidetes (with low  
183 statistical support).

184 In Heimdallarchaeia the following archaeum<sup>24</sup> components were identified: flaG, flaI, flaJ, flaK, flaH  
185 and a homolog of the archaeal flagellin (IPR013373). The presence of sensory methyl-accepting  
186 chemotaxis proteins (MCPs), together with a complete chemotaxis signal transduction pathway  
187 (CheA, B, C, D, R, W, Y), suggests that Heimdallarchaeia may be motile.

188

### 189 **Supplementary References**

- 190 1. Gastescu, P. & Teodorescu, D. C. The lakes of the Romanian Black Sea coast. Man-induced  
191 changes, water regime, present state. *Rev. Roum. Géogr./Rom. Journ. Geogr.* **60**, 27–42  
192 (2016).
- 193 2. Fedorov, P. V. Postglacial transgression of the Black Sea. *Int. Geol. Rev.* **14**, 160–164 (1972).
- 194 3. Liu, Y. *et al.* Comparative genomic inference suggests mixotrophic lifestyle for Thorarchaeota.  
195 *ISME J.* **12**, 1021–1031 (2018).
- 196 4. Zaremba-Niedzwiedzka, K. *et al.* Asgard archaea illuminate the origin of eukaryotic cellular  
197 complexity. *Nature* **541**, 353–358 (2017).
- 198 5. Tabita, F. R. *et al.* Function, structure, and evolution of the RubisCO-like proteins and their  
199 RubisCO homologs. *Microbiol. Mol. Biol. Rev.* **71**, 576–599 (2007).
- 200 6. Seitz, K. W., Lazar, C. S., Hinrichs, K.-U., Teske, A. P. & Baker, B. J. Genomic reconstruction of a  
201 novel, deeply branched sediment archaeal phylum with pathways for acetogenesis and sulfur  
202 reduction. *ISME J.* **10**, 1696–1705 (2016).
- 203 7. Ilikchyan, I. N., McKay, R. M. L., Zehr, J. P., Dyrman, S. T. & Bullerjahn, G. S. Detection and  
204 expression of the phosphonate transporter gene *phnD* in marine and freshwater  
205 picocyanobacteria. *Environ. Microbiol.* **11**, 1314–1324 (2009).
- 206 8. Trautmann, A., Watzler, B., Wilde, A., Forchhammer, K. & Posten, C. Effect of phosphate  
207 availability on cyanophycin accumulation in *Synechocystis* sp. PCC 6803 and the production  
208 strain BW86. *Algal Res.* **20**, 189–196 (2016).
- 209 9. Orita, I. *et al.* The Ribulose Monophosphate Pathway Substitutes for the Missing Pentose  
210 Phosphate Pathway in the Archaeon *Thermococcus kodakaraensis*. *J. Bacteriol.* **188**, 4698–  
211 4704 (2006).
- 212 10. Brasen, C., Esser, D., Rauch, B. & Siebers, B. Carbohydrate metabolism in Archaea: current  
213 insights into unusual enzymes and pathways and their regulation. *Microbiol. Mol. Biol. Rev.*  
214 **78**, 89–175 (2014).
- 215 11. Uwe, S. & J., E. B. The PEP–pyruvate–oxaloacetate node as the switch point for carbon flux  
216 distribution in bacteria. *FEMS Microbiol. Rev.* **29**, 765–794 (2006).



- 217 12. Tittmann, K., Golbik, R., Ghisla, S. & Hübner, G. Mechanism of Elementary Catalytic Steps of  
218 Pyruvate Oxidase from *Lactobacillus plantarum*. *Biochemistry* **39**, 10747–10754 (2000).
- 219 13. Kelley, L. A., Mezulis, S., Yates, C. M., Wass, M. N. & Sternberg, M. J. E. The Phyre2 web portal  
220 for protein modeling, prediction and analysis. *Nat. Protoc.* **10**, 845–858 (2015).
- 221 14. Sousa, F. L., Neukirchen, S., Allen, J. F., Lane, N. & Martin, W. F. Lokiarchaeon is hydrogen  
222 dependent. *Nat. Microbiol.* **1**, 16034 (2016).
- 223 15. Parks, D. H., Imelfort, M., Skennerton, C. T., Hugenholtz, P. & Tyson, G. W. CheckM: assessing  
224 the quality of microbial genomes recovered from isolates, single cells, and metagenomes.  
225 *Genome Res.* **25**, 1043–1055 (2015).
- 226 16. Berg, I. A. Ecological Aspects of the Distribution of Different Autotrophic CO(2) Fixation  
227 Pathways. *Appl. Environ. Microbiol.* **77**, 1925–1936 (2011).
- 228 17. Wood, H. G. Life with CO or CO<sub>2</sub> and H<sub>2</sub> as a source of carbon and energy. *FASEB J. Off. Publ.*  
229 *Fed. Am. Soc. Exp. Biol.* **5**, 156–163 (1991).
- 230 18. Techtmann, S. M. *et al.* Regulation of Multiple Carbon Monoxide Consumption Pathways in  
231 Anaerobic Bacteria. *Front. Microbiol.* **2**, 147 (2011).
- 232 19. Ragsdale, S. W. & Pierce, E. Acetogenesis and the Wood-Ljungdahl pathway of CO(2) fixation.  
233 *Biochim. Biophys. Acta* **1784**, 1873–1898 (2008).
- 234 20. King, G. M. Uptake of carbon monoxide and hydrogen at environmentally relevant  
235 concentrations by mycobacteria. *Appl. Environ. Microbiol.* **69**, 7266–7272 (2003).
- 236 21. King, G. M. Nitrate-dependent anaerobic carbon monoxide oxidation by aerobic CO-oxidizing  
237 bacteria. *FEMS Microbiol. Ecol.* **56**, 1–7 (2006).
- 238 22. King, G. M. & Weber, C. F. Distribution, diversity and ecology of aerobic CO-oxidizing bacteria.  
239 *Nat. Rev. Microbiol.* **5**, 107–118 (2007).
- 240 23. Adam, P. S., Borrel, G. & Gribaldo, S. Evolutionary history of carbon monoxide  
241 dehydrogenase/acetyl-CoA synthase, one of the oldest enzymatic complexes. *Proc. Natl.*  
242 *Acad. Sci.* (2018).
- 243 24. Ternes, C. M. & Schönknecht, G. Gene Transfers Shaped the Evolution of De Novo NAD(+)   
244 Biosynthesis in Eukaryotes. *Genome Biol. Evol.* **6**, 2335–2349 (2014).

245

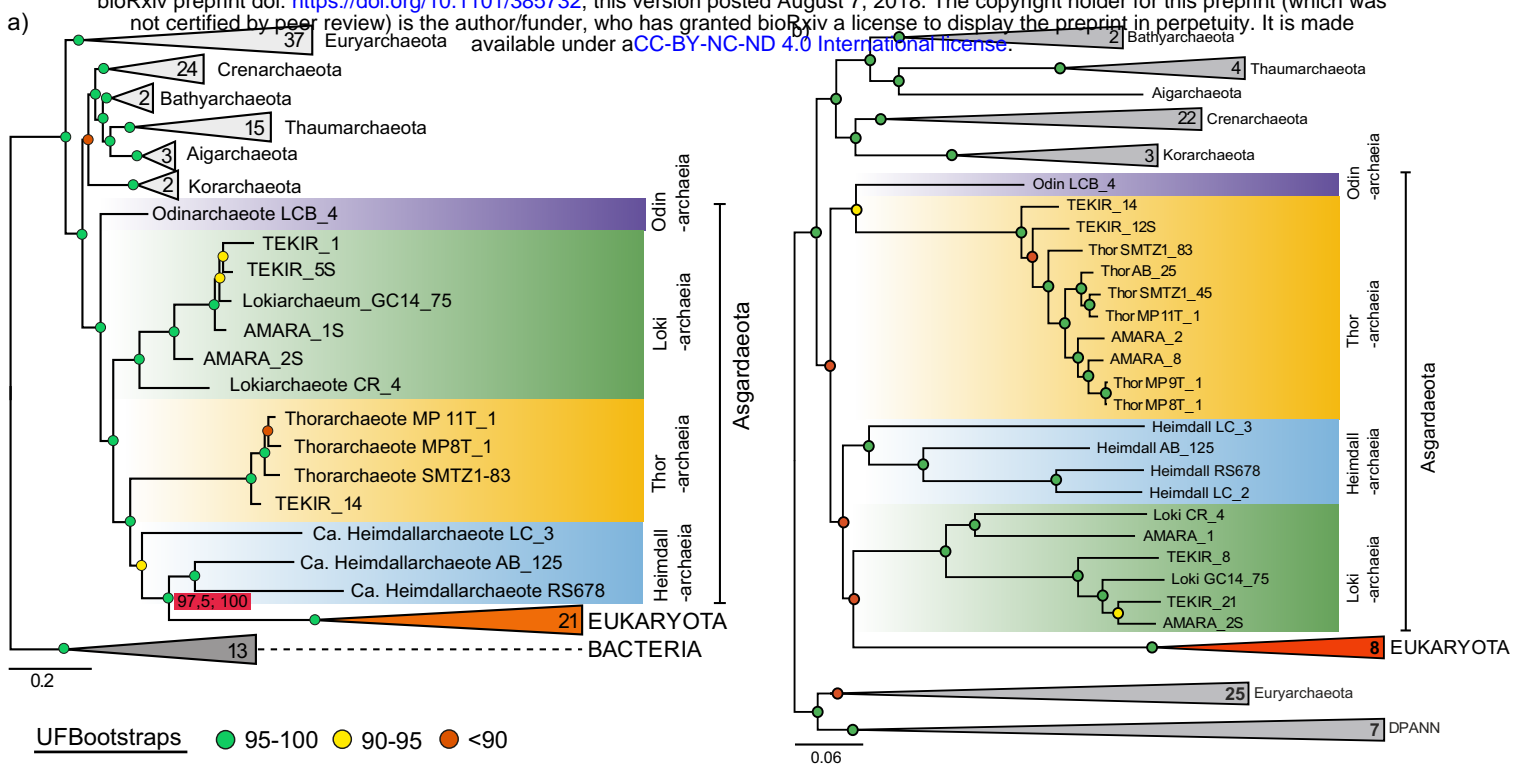

**Supplementary Figure S1.** a) Maximum-likelihood phylogeny of concatenated SSU/LSU gene sequences spanning the three domains of life. The red rectangle indicates the results of the Shimodaira-Hasegawa test and ultrafast bootstrapping for the Eukaryota/Heimdallarchaeia cluster. b) Maximum-likelihood phylogenomic tree based on 48 ribosomal proteins. Bootstrap values are indicated by colored circles (legend in the lower-left part of the figure). The scale bars indicate number of substitutions per site.

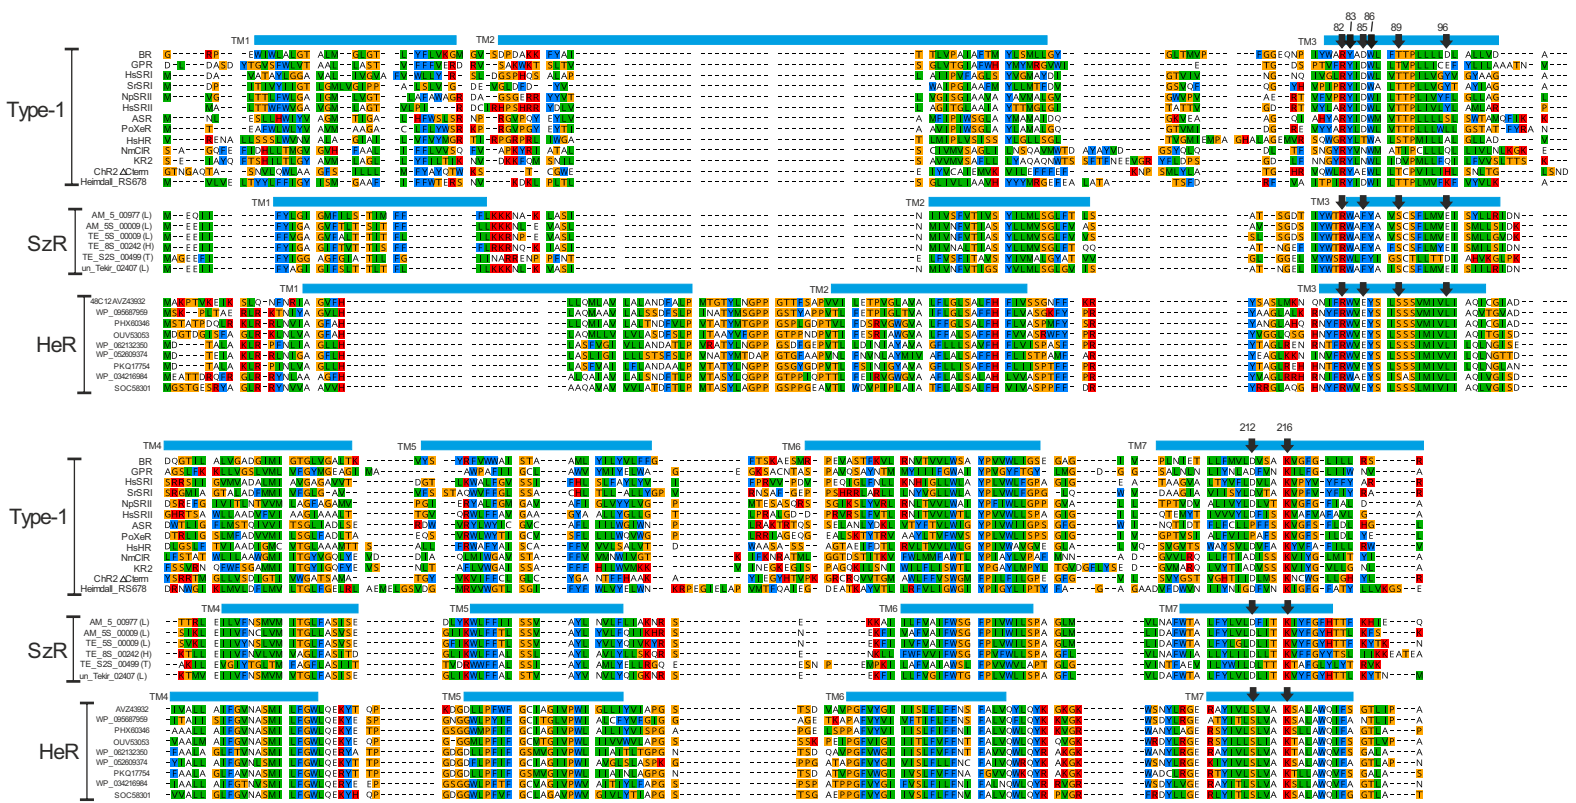

**Supplementary Figure S2.** Multiple alignment of type-1, schizorhodopsins (SzR) and heliorhodopsins (HeR). Transmembrane helices (labeled as TM1-7) are shown for the first sequence of each group at the top. Sequences of type-1 rhodopsins are - BR: bacteriorhodopsin (BR), green absorbing proteorhodopsin (GPR), sensory rhodopsin I from *Halobacterium salinarum* (HsSRI) and *Salinibacter ruber* (SrSRI), sensory rhodopsin II from *Natronomonas pharaonis* (NpSRII) and *H. salinarum* (HsSRII), *Anabaena* sensory rhodopsin (ASR), xenorhodopsin from *Parvularcula oceani* (PoXeR), halorhodopsin from *H. salinarum* (HsHR), chloride-pump rhodopsin from *Nonlabens marinus* (NmCIR), sodium- pump rhodopsin from *Krokinobacter eikastus* (KR2), and cation channelrhodopsin2 from *Chlamydomonas reinhardtii* (C-terminal side omitted, ChR2  $\Delta$ C-term) and putative proton-pump from Heimdallarchaeota MAG RS678 assembled from Red Sea metagenome. Sequences of Asgardaeota schizorhodopsins: Six sequences are shown, the number in brackets indicates taxonomic affiliation of the metagenome assembled genome- L – Lokiarchaeia, H – Heimdallarchaeia and T – Thorarchaeia. Sequences of heliorhodopsins are – 48C12: original actinobacterial fosmid clone from Lake Kinneret, WP\_095687959: freshwater actinobacterium *Ca. Nanopelagicus abundans*, PHX60346 : Actinobacteria bacterium (Lake Baikal metagenome), OUV53053: Actinomycetales bacterium TMED115 (marine metagenome), WP\_062132350 Demequina aestuarii, WP\_052609374: freshwater Actinobacteria bacterium IMCC26256, PKQ17754: Actinobacteria bacterium HGW-Actinobacteria-8 (groundwater metagenome) WP\_034216984: *Actinoplanes subtropicus*, SOC58301: *Ornithinimicrobium pekingense*. In all groups the functionally important positions 82, 83, 85,86, 89,96, 212 and 216 (bacteriorhodopsin numbering) are marked with black arrows.

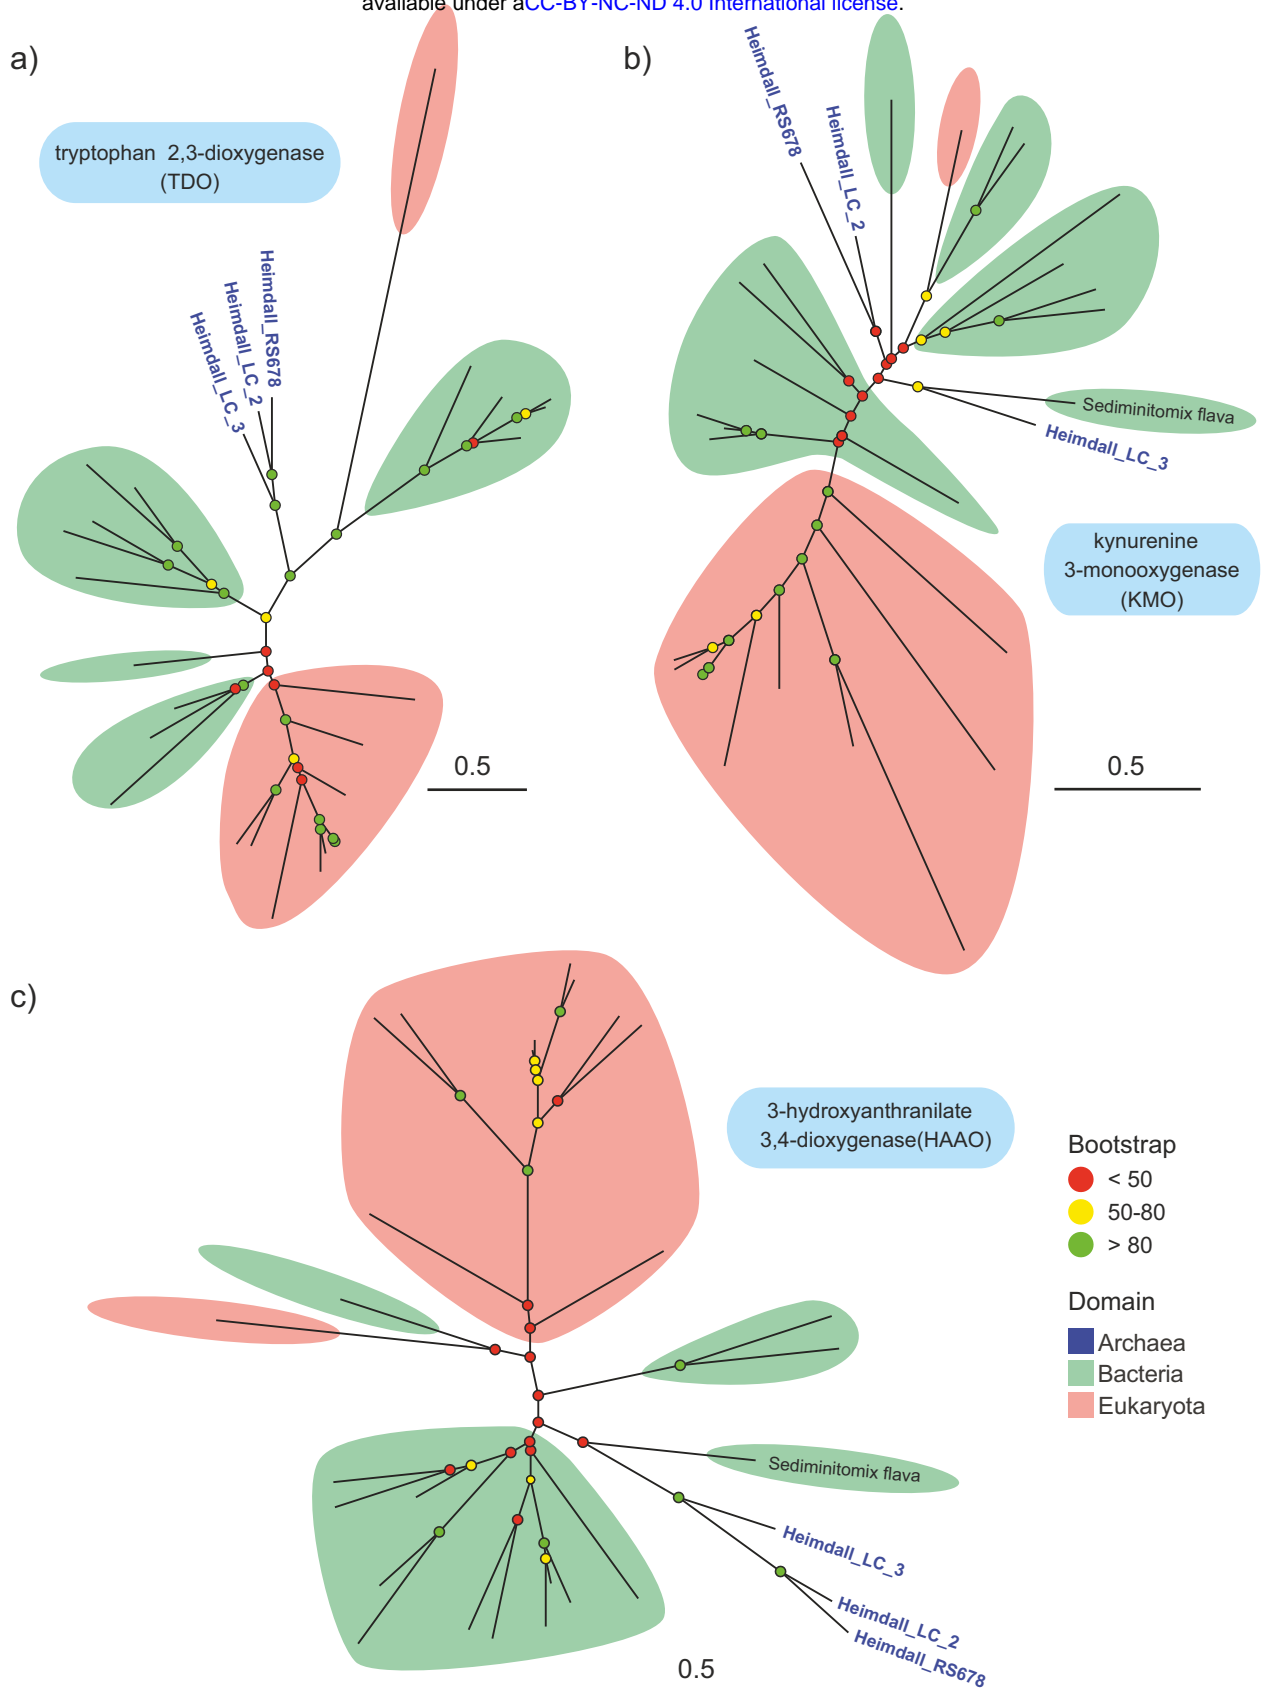

**Supplementary Figure S3.** Maximum-likelihood phylogenetic trees of key enzymes of the kynurenine pathway: a) tryptophan 2,3-dioxygenase, b) kynurenine 3-monoxygenase and 3-hydroxyanthranilate 3,4-dioxygenase, respectively. Bootstrap values are indicated by colored circles (legend in the lower-right part of the figure). The names of Heimdallarchaeia MAGs are highlighted with blue color.

a)

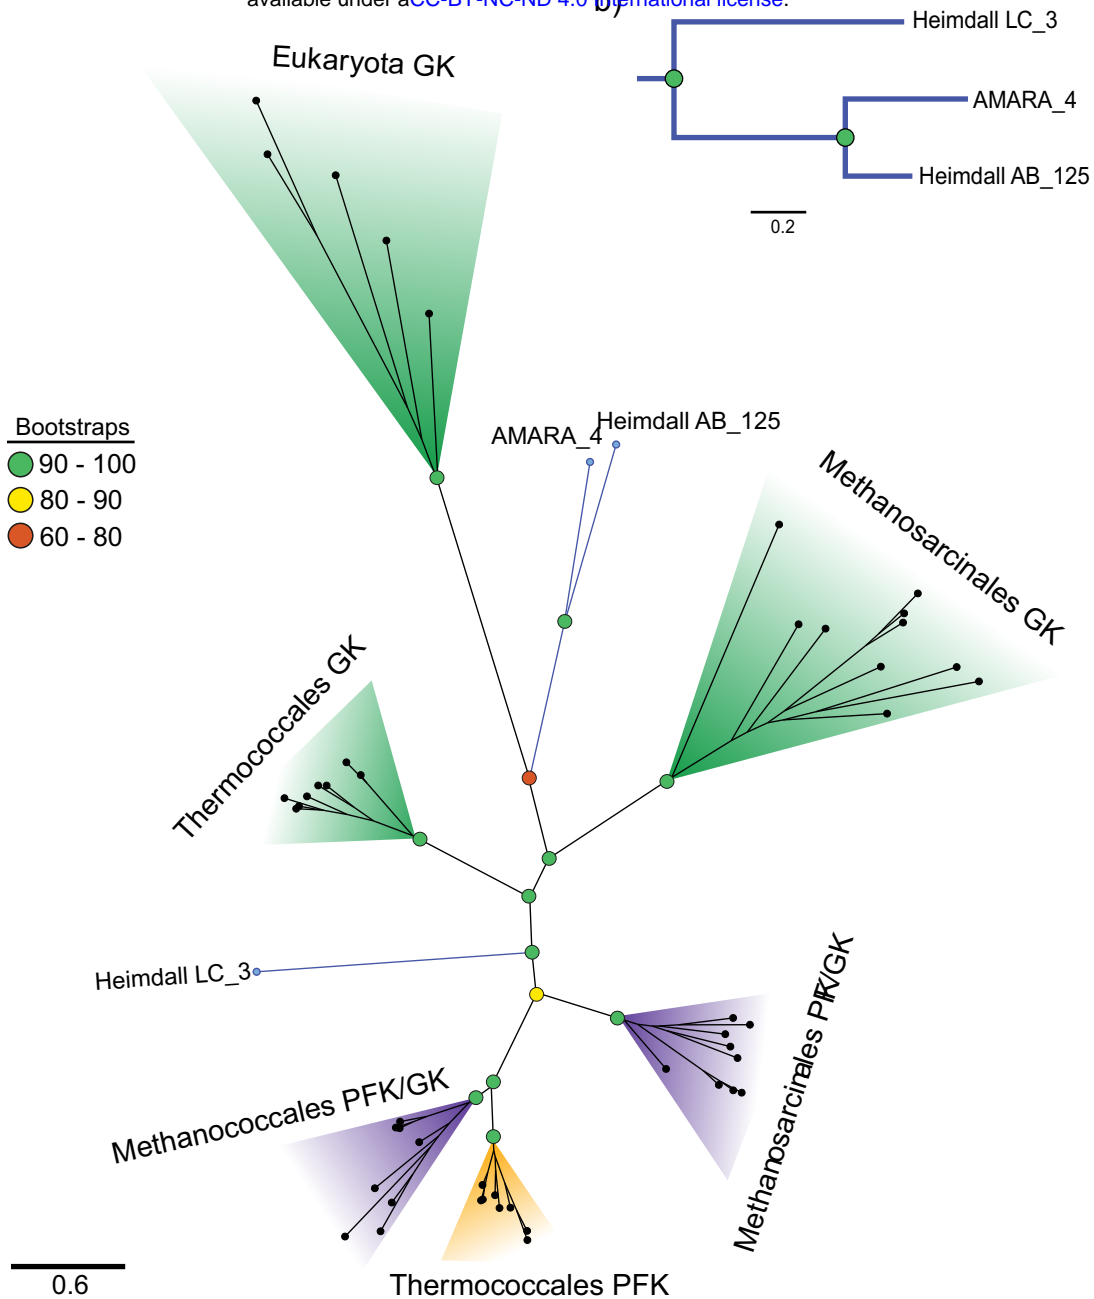

c)

|                      | Heimdall LC_3                 | Ser | Ile | Ser | Ser | Gly | Lys | Ala | Lys | 172 | Ile |
|----------------------|-------------------------------|-----|-----|-----|-----|-----|-----|-----|-----|-----|-----|
| GK                   | Thermococcus sibiricus        | Ser | Ile | Lys | Leu | Gly | Lys | Ala | Ile | Glu | Trp |
|                      | Pyrococcus abyssi             | Ser | Val | Lys | Arg | Gly | Lys | Ala | Ala | Glu | Leu |
|                      | Thermococcus gammatolerans    | Ser | Ile | Arg | Arg | Gly | Lys | Ala | Ala | Glu | Leu |
| PFK                  | Thermococcus onnurineus       | Ala | Leu | Lys | Thr | Gly | Lys | Pro | Met | Ala | Val |
|                      | Thermococcus barophilus       | Ala | Leu | Lys | Thr | Gly | Lys | Pro | Met | Ala | Val |
|                      | Thermococcus zilligii         | Ala | Leu | Lys | Thr | Gly | Lys | Pro | Met | Ala | Val |
| PFK/GK               | Methanocaldococcus jannaschii | Ser | Ile | Lys | Thr | Gly | Lys | Pro | Ala | Glu | Val |
|                      | Methanocaldococcus vulcanius  | Ser | Ile | Lys | Thr | Gly | Lys | Pro | Ala | Glu | Val |
|                      | Methanococcus vannielii       | Ala | Met | Arg | Ser | Gly | Lys | Pro | Val | Glu | Val |
|                      | Methanohalobium evestigatum   | Ala | Met | Arg | Asp | Gly | Lys | Ala | Ala | Glu | Val |
|                      | Methanosarcina acetivorans    | Ser | Met | Arg | Glu | Gly | Lys | Ala | Ala | Glu | Val |
|                      | Methanohalobium psychrophilus | Ser | Met | Arg | Asp | Gly | Lys | Ala | Ala | Glu | Val |
| Methanoterris igneus | Ser                           | Met | Lys | Thr | Gly | Lys | Pro | Ala | Glu | Val |     |

**Supplementary Figure S4.** a) Maximum-likelihood phylogenetic tree of the the ADP-dependent kinases family in Archaea and Eukaryota. The branches belonging to Heimdallarchaeia are colored in blue. The colored panels highlight clades with: glucokinase activity-green, phosphofructokinase activity -orange, and both gluco- and phosphofructokinase activity-purple. b) Phylogenomic subtree, generated using maximum-likelihood methods, which shows Heimdall LC\_3 MAG as the oldest within the ones that were found to harbor ADP-dependent kinases. The scale bars indicate number of substitutions per site. Bootstrap values are indicated by colored circles (legend in the lower-right part of the figure). c) Sequence alignment of ADP-dependent kinases highlighting the functionally important position 172, as inferred from Castro-Fernandez et al. 2017. The similarity-coloring scheme is based on the BLOSUM62 matrix.



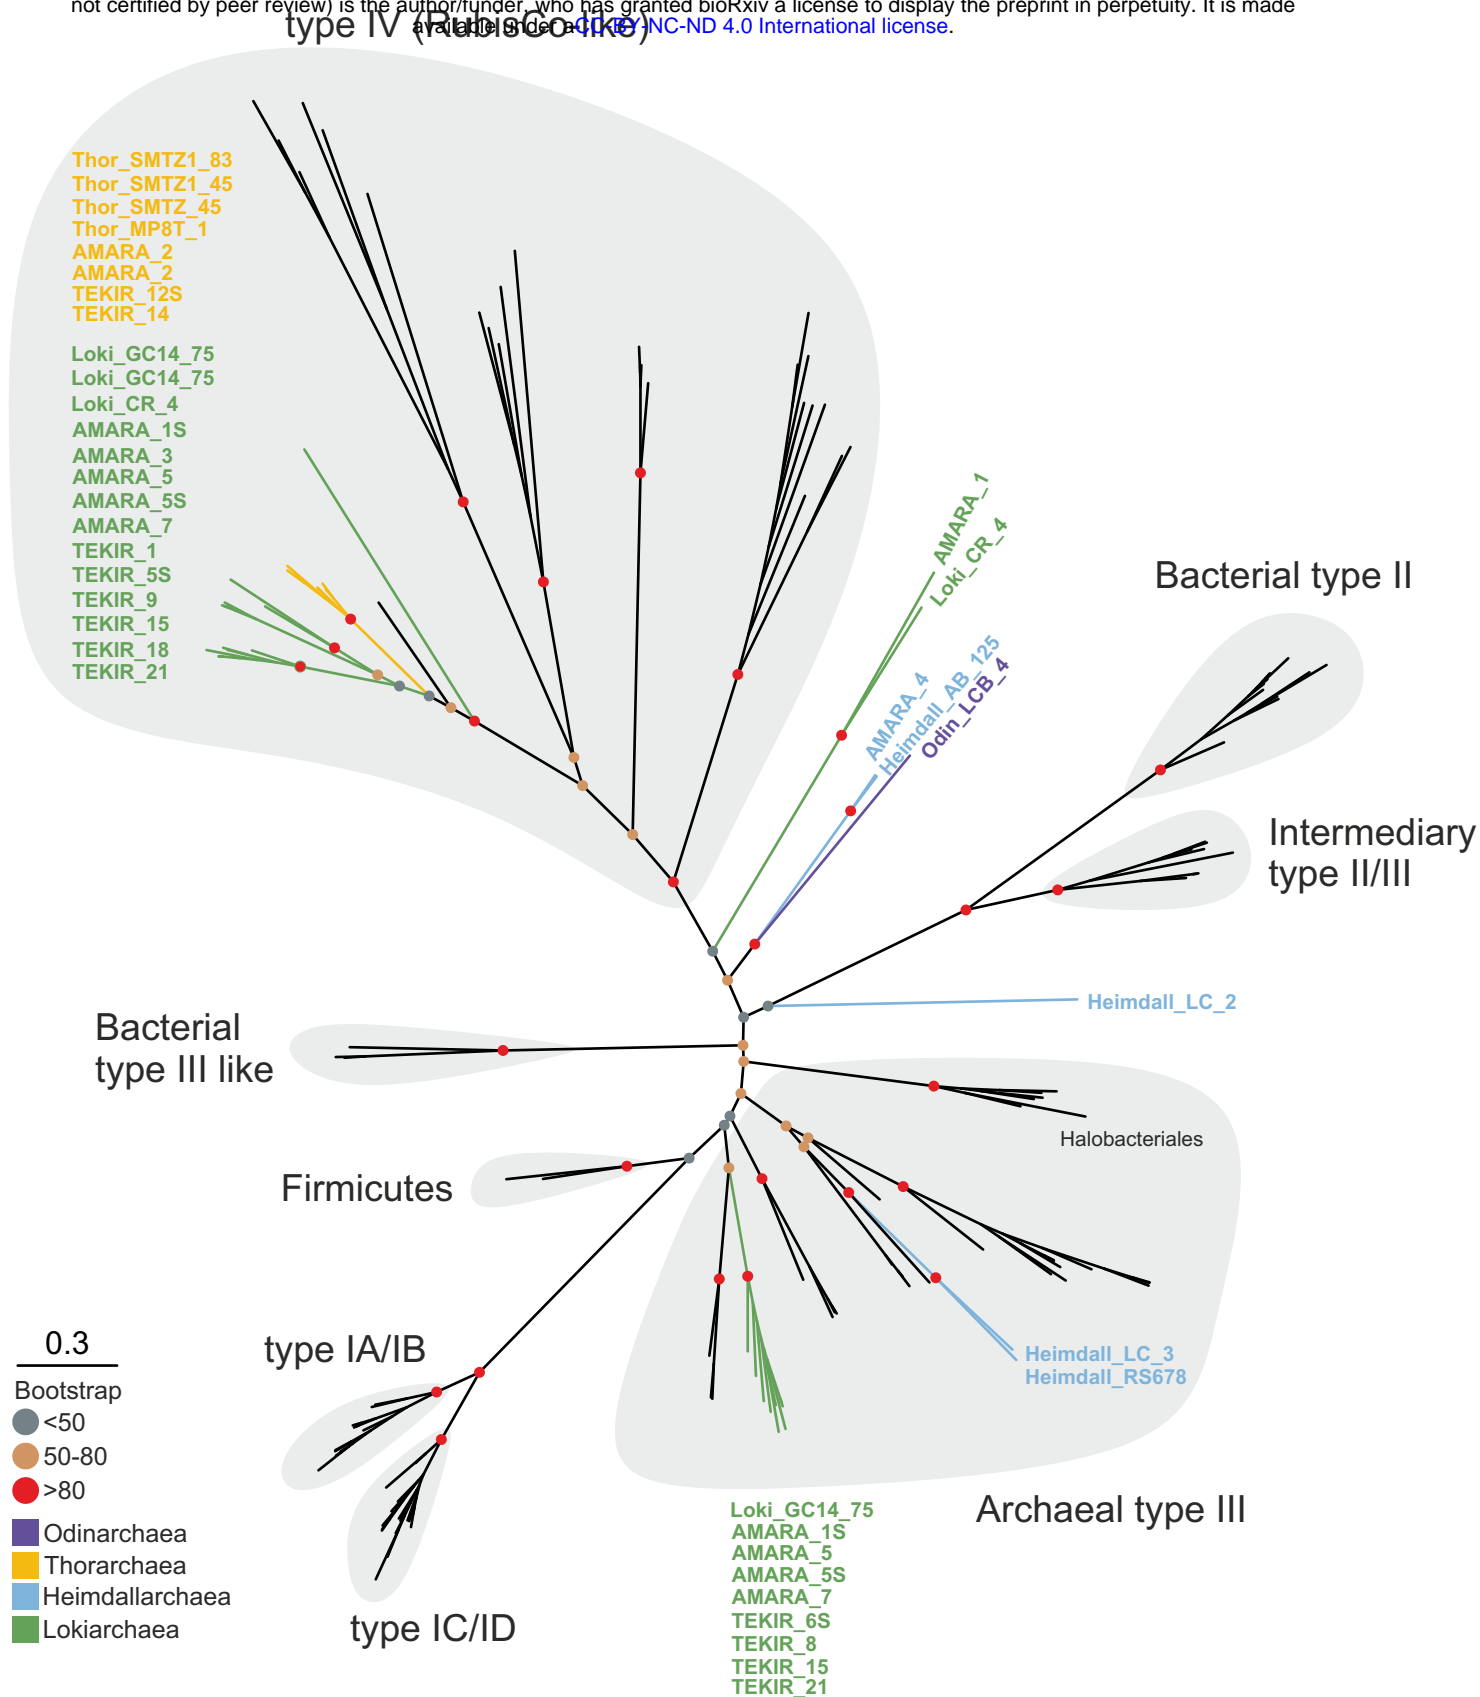

**Supplementary Figure S5-** Maximum likelihood tree of the large subunit of RubisCo (types I-III) and RubisCo-like (type IV) (*rbcl*, K01601) protein sequences (n=146) of bacterial and archaeal taxa. Reference sequences were chosen based on previous trees constructed by Tabita et al. 2007 and Wrighton et al. 2016. The branches representing the members of Asgard superphylum are colored based on their affiliated phylum (legends on the bottom left). The scale bar indicates the amino acid substitutions per site.

## Lokiarchaeia

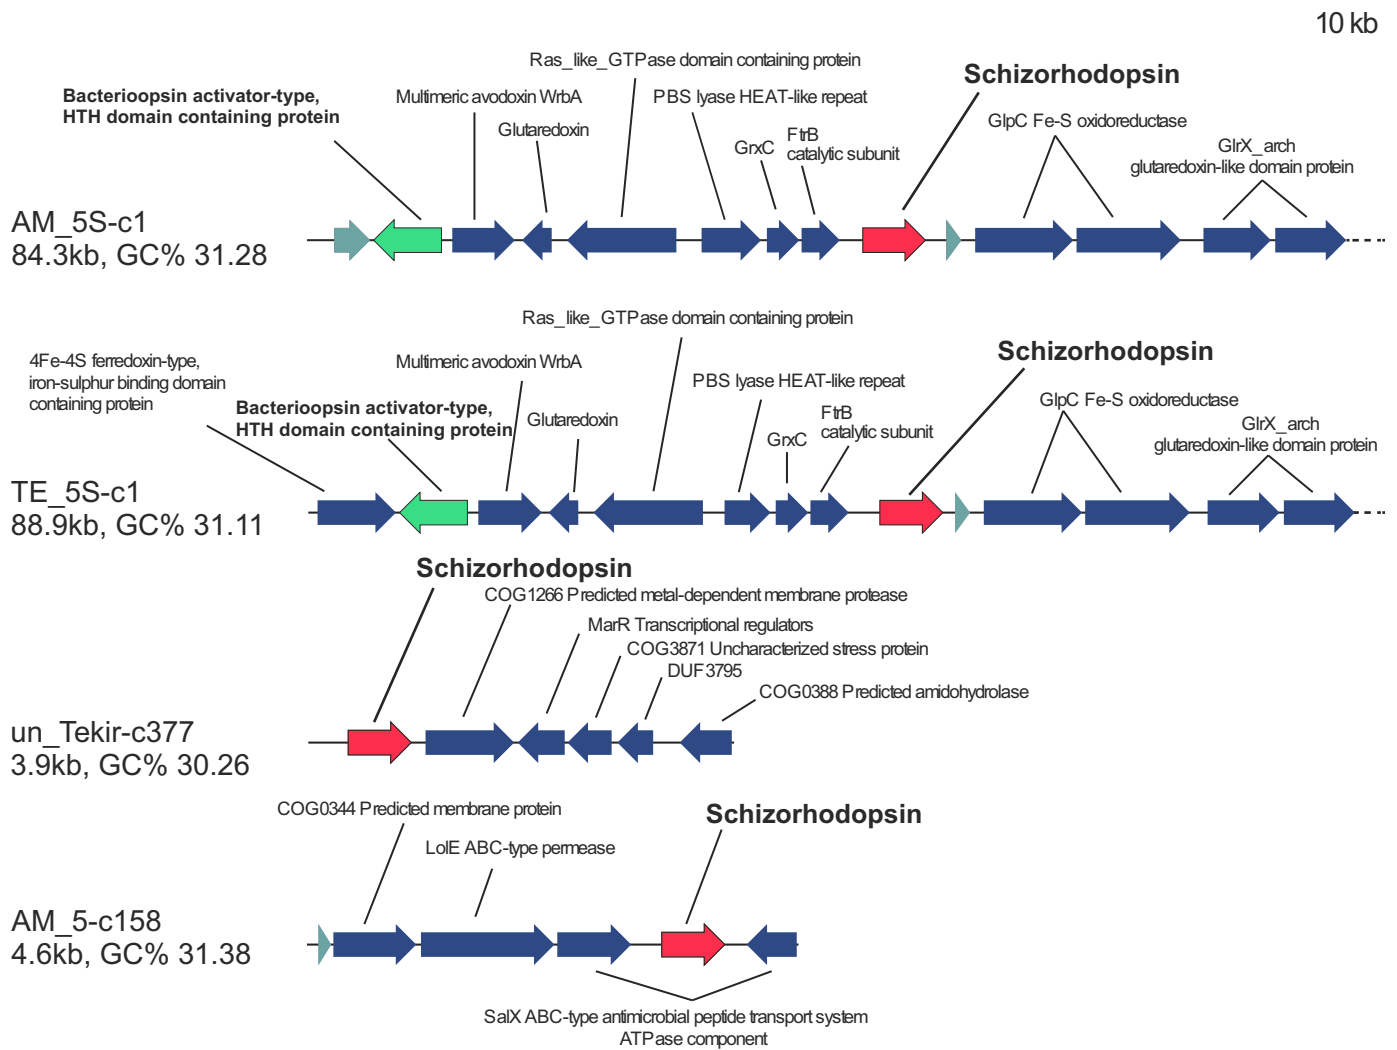

## Thorarchaeia

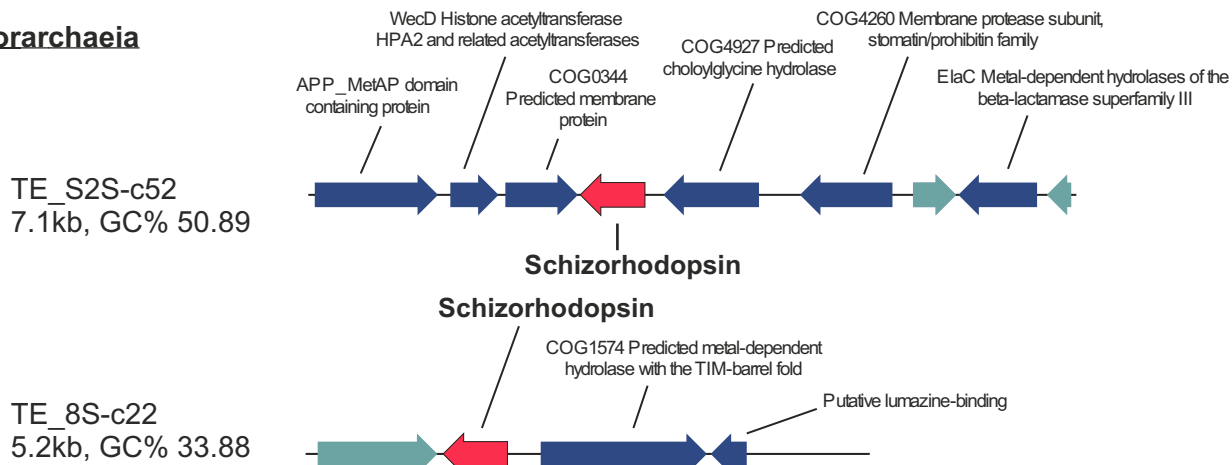

## Heimdallarchaeia

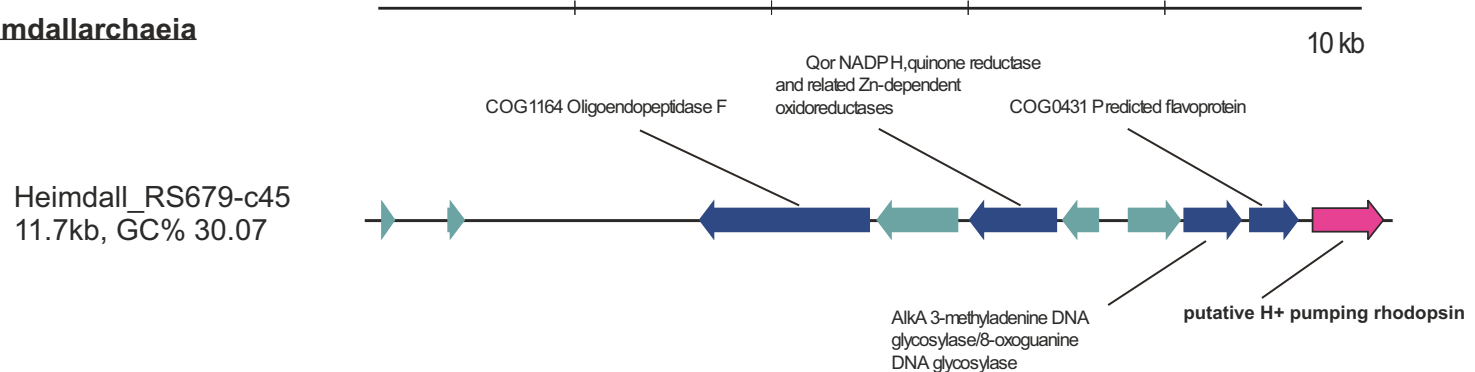

**Supplementary Figure S6.** Genomic context of rhodopsins in Asgardaeota MAGs. Schizorhodopsins are shown in red, bacteriorhodopsin activator-like protein in green, bacteriorhodopsin in purple and the hypothetical proteins in grey. 10 kb scale bars are shown at the top of each category.

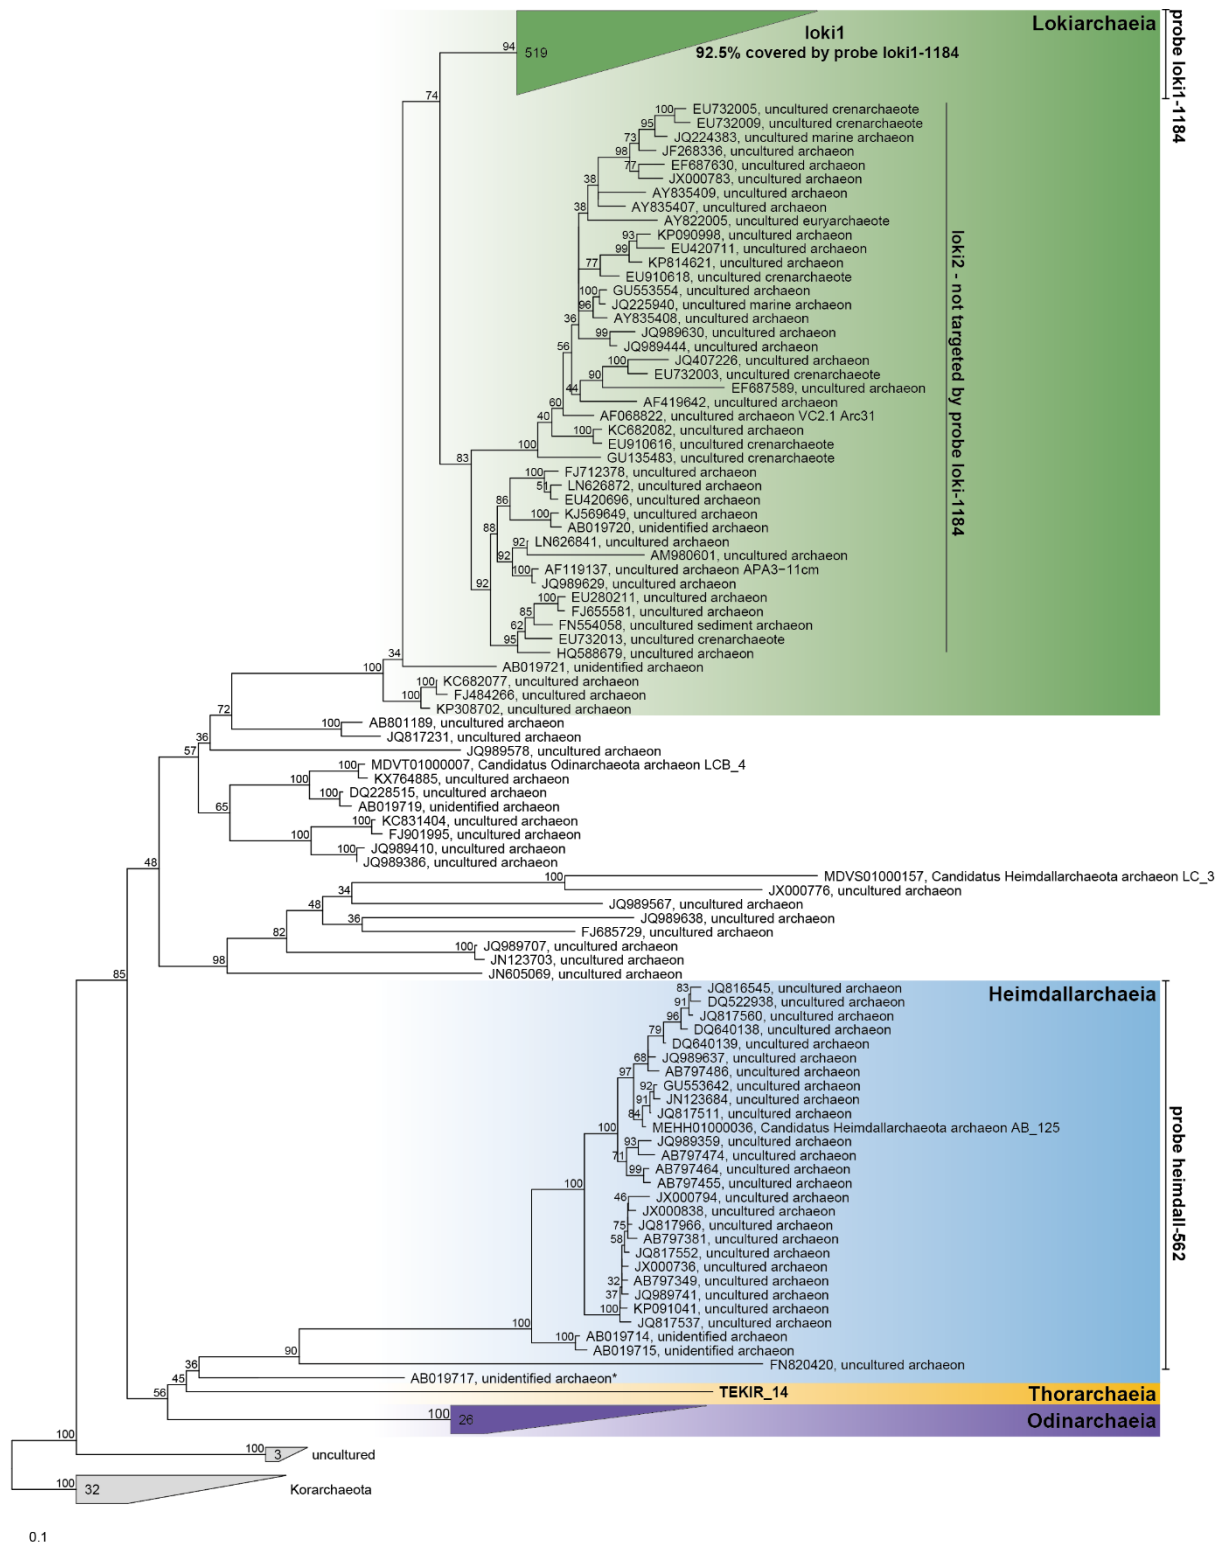

**Supplementary Figure S7.** RAxML tree (Randomized Axelerated Maximum Likelihood tree with GTR-GAMMA model, 100 bootstraps) of 16S rRNA genes of Asgardaeota with target hits of probes loki1-1184 and heimdall-562. Branches with bootstrap supports <30% were collated to multifurcations. The number of sequences is given for collapsed branches; an asterisk indicates the sequence not targeted by probe heimdall-562.

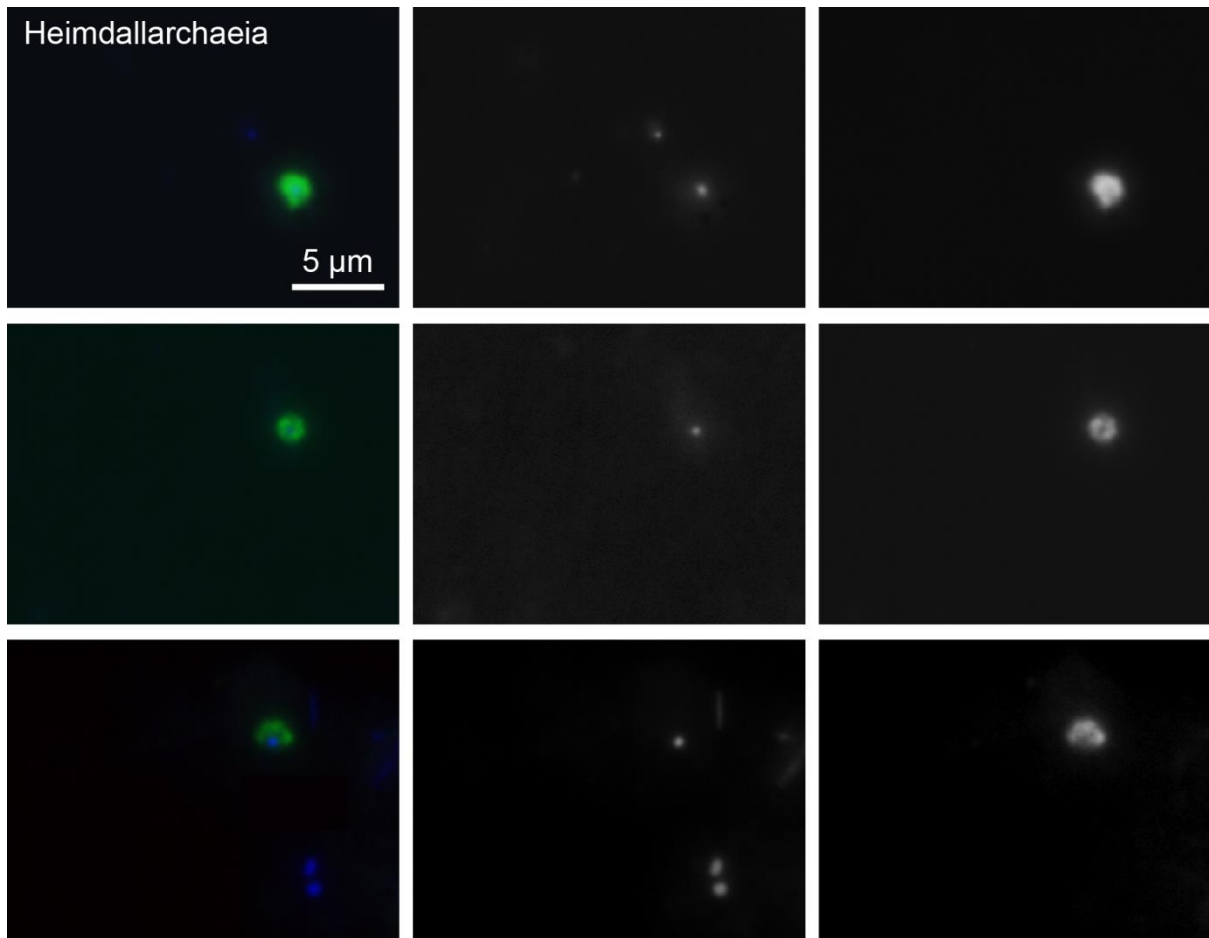

**Supplementary Figure S8.** CARD-FISH imaging of Heimdallarchaeia hybridized with probe heimdall-526. The left panels display overlay images of probe signal (green), DAPI staining (blue) and autofluorescence (red), the middle panels DAPI staining of DNA, the right panels CARD-FISH staining of proteins. Individual microphotographs of autofluorescent objects are not displayed because of low intensities and no interference with probe signals. The scale bar (5  $\mu$ m) top left applies to all microphotographs.

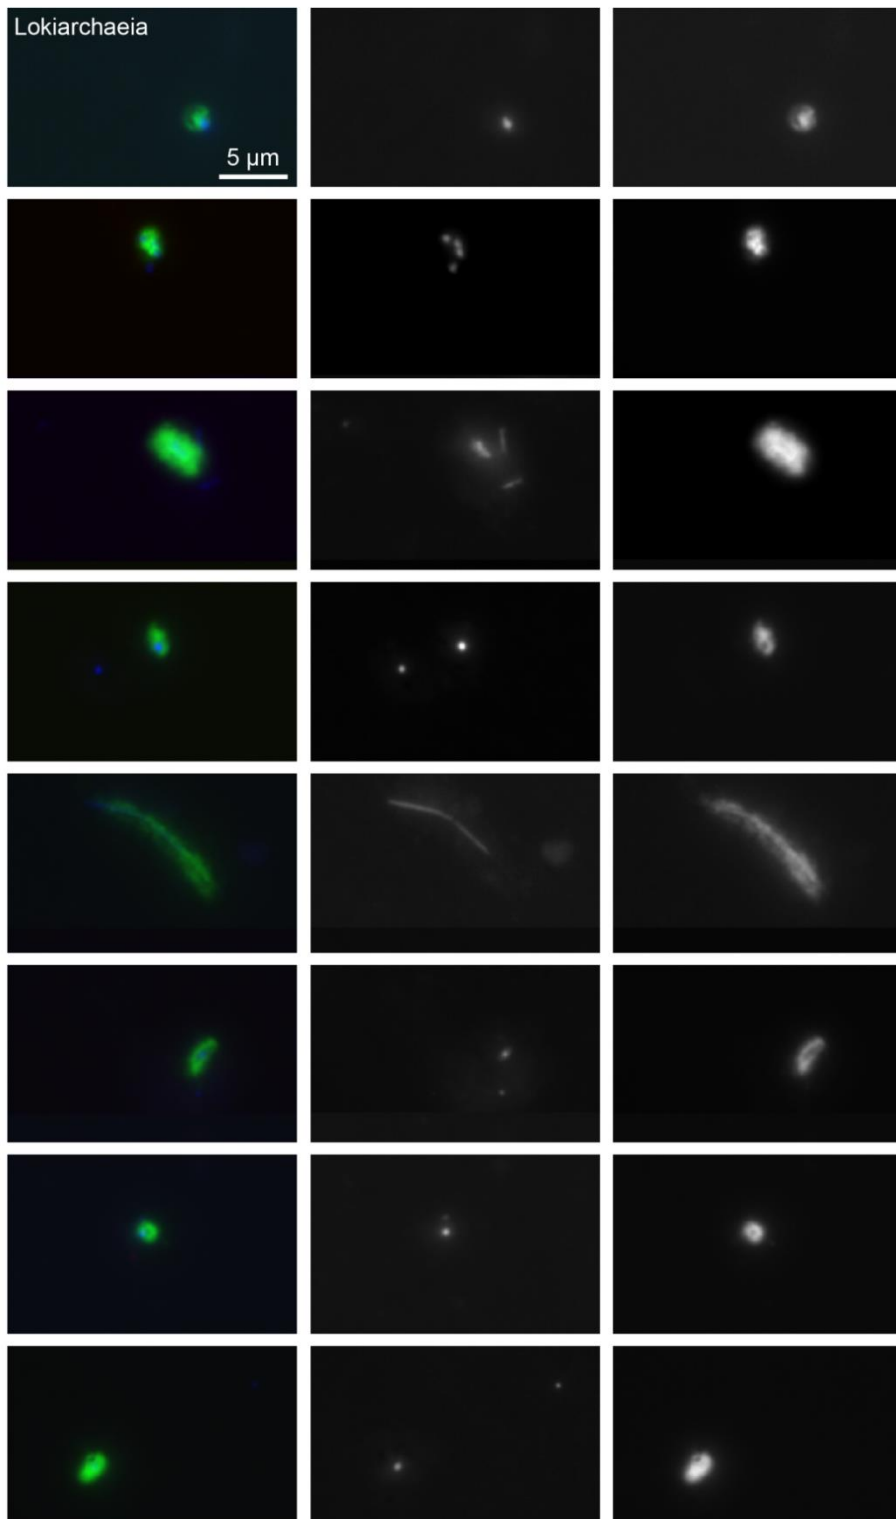

**Supplementary Figure S9.** CARD-FISH imaging of Lokiarchaeia hybridized with probe loki1-1184. The left panels display overlay images of probe signal (green), DAPI staining (blue) and autofluorescence (red), the middle panels DAPI staining of DNA, the right panels CARD-FISH staining of proteins. Individual microphotographs of autofluorescent objects are not displayed because of low intensities and no interference with probe signals. The scale bar (5 μm) top left applies to all microphotographs.



### **Supplementary\_Table\_S1.xlsx**

This file contains general statistics for MAGs recovered from the Amara and Tekirghiol Lakes. Estimated genome length (EGS) was determined for MAGs with completeness >70%.

**Supplementary Table S2.** List of Asgardaeota genome assemblies downloaded from the NCBI genomes repository (<https://www.ncbi.nlm.nih.gov/genome>) for this study.

| NCBI tax. ID | Organism name         | Isolate  | GenBank Assembly Accession | Isolation source                |
|--------------|-----------------------|----------|----------------------------|---------------------------------|
| 2026747      | Ca. Heimdallarchaeota | RS678    | GCA_002728275.1            | Marine water sample             |
| 1841596      | Ca. Heimdallarchaeota | AB_125   | GCA_001940755.1            | Marine sediment                 |
| 1841597      | Ca. Heimdallarchaeota | LC_2     | GCA_001940725.1            | Hydrothermal vent sediment      |
| 1841598      | Ca. Heimdallarchaeota | LC_3     | GCA_001940645.1            | Hydrothermal vent sediment      |
| 1849166      | Ca. Lokiarchaeota     | CR_4     | GCA_001940655.1            | Terrestrial subsurface sediment |
| 1538547      | Lokiarchaeum sp.      | GC14_75  | GCA_000986845.1            | Hydrothermal vent sediment      |
| 1841599      | Ca. Odinararchaeota   | LCB_4    | GCA_001940665.1            | Hot spring                      |
| 1837170      | Ca. Thorarchaeota     | AB_25    | GCA_001940705.1            | Marine sediment                 |
| 1969372      | Ca. Thorarchaeota     | MP11T_1  | GCA_002825515.1            | Mangrove wetland sediments      |
| 1969370      | Ca. Thorarchaeota     | MP8T_1   | GCA_002825465.1            |                                 |
| 1969371      | Ca. Thorarchaeota     | MP9T_1   | GCA_002825535.1            |                                 |
| 1706443      | Ca. Thorarchaeota     | SMTZ-45  | GCA_001563465.1            | Sulfate-methane transition      |
| 1706444      | Ca. Thorarchaeota     | SMTZ1-45 | GCA_001563335.1            | zone estuary sediments          |
| 1706445      | Ca. Thorarchaeota     | SMTZ1-83 | GCA_001563325.1            | 16-26 cm                        |

**Supplementary\_Table\_S3.xlsx**

KEGG orthology annotation for Asgardaeota MAGs.

**Supplementary Table S4.** Accession numbers list for INTERPRO (IPR) domains, COGs (Cluster of Orthologous Groups) and UniProtKB protein sequences used to identify potential Eukaryotic Signature Proteins in Asgardaeota MAGs. Particularly, the first ESP (1\*) was identified by local scanning in MAGs with BLASTP using human sequences downloaded from UNIPROT (<https://www.uniprot.org/>).

| Nr. crt. | Description                                        | IPR domain/COG/UniProtKB                       |
|----------|----------------------------------------------------|------------------------------------------------|
| 1*       | DNA polymerase, $\epsilon$ -like catalytic subunit | Q59EA9, Q9UNF3, Q9Y5S5, Q07864, Q9Y5S4, F5H1D6 |
| 2        | Topoisomerase IB                                   | COG03569                                       |
| 3        | RNA polymerase, subunit G (rpb8)                   | IPR031555                                      |
| 4        | Ribosomal protein L22e                             | IPR002671                                      |
| 5        | Ribosomal protein L28e/Mak16                       | IPR029004                                      |
| 6        | Tubulins                                           | IPR000217                                      |
| 7        | Actin family (divergent)                           | IPR004000                                      |
| 8        | Actin/actin-like conserved site                    | IPR020902                                      |
| 9        | Arp2/3 complex subunit 2/4                         | IPR008384                                      |
| 10       | Gelsolin-domain protein                            | IPR007122                                      |
| 11       | Profilin                                           | IPR036140                                      |
| 12       | ESCRT-I: Vps28-like                                | IPR007143                                      |
| 13       | ESCRT-I: steadiness box domain                     | IPR017916                                      |
| 14       | ESCRT-II: EAP30 domain                             | IPR007286                                      |
| 15       | ESCRT-II: Vps25-like                               | IPR014041 and IPR008570                        |
| 16       | ESCRTIII: Vps2/24/46-like                          | IPR005024                                      |
| 17       | Ubiquitin-domain protein                           | IPR000626                                      |
| 18       | E2-like ubiquitin conjugating protein              | IPR000688                                      |
| 19       | E3 UFM1-protein ligase 1                           | IPR018611                                      |
| 20       | RAG-type GTPase domain                             | IPR006762                                      |
| 21       | Longin-domain protein                              | IPR011012                                      |
| 22       | Vacuolar fusion protein Mon1                       | IPR004353                                      |
| 23       | RLC7 roadblock domain protein                      | IPR004942                                      |
| 24       | TRAPP-domain protein                               | IPR007194                                      |
| 25       | Zinc finger, Sec23/Sec24-type                      | IPR006896                                      |
| 26       | Arrestin-like proteins (C-terminal)                | IPR011021                                      |
| 27       | Vesicle coat complex COPII sub. SEC24/SFB2/SFB3    | COG5028                                        |
| 28       | Folliculin (N-terminal)                            | IPR037520                                      |
| 29       | Ribophorin I                                       | IPR007676                                      |
| 30       | Oligosaccharyl transf. OST3/OST6                   | IPR021149                                      |
| 31       | Oligosaccharyl transf. STT32                       | IPR003674                                      |
| 32       | Ezrin/radixin/moesin C-terminal domain             | IPR011259                                      |
| 33       | active zone protein ELKS                           | IPR019323                                      |

### **Supplementary\_Table\_S5.xlsx**

List of taxa used for phylogenetic ribosomal RNA (small subunit SSU and large subunit LSU) as well as ribosomal protein-based inferences based mainly on a previously published list

<https://www.nature.com/articles/nature21031>. Silva SSU and LSU rRNA IDs are indicated. For MAGs recovered in this study, contig ID and positions are indicated (highlighted).





**Supplementary Table S7.** Protein RefSeq accession numbers for sequences used in phylogenetic inferences for key components of the Tryptophan degradation pathway (kynurenine pathway) in Heimdallarchaea.

| Organism name                                | NCBI TaxID | Domain    | tryptophan 2,3-dioxygenase (TDO) | kynurenine 3-monooxygenase (KMO) | 3-hydroxyanthranilate 3,4-dioxygenase (HAAO) |
|----------------------------------------------|------------|-----------|----------------------------------|----------------------------------|----------------------------------------------|
| <i>Actinomadura meyeriae</i>                 | 240840     | Bacteria  | WP_089326016.1                   | WP_089325941.1                   | WP_089327247.1                               |
| <i>Kribbella flavida</i>                     | 479435     | Bacteria  | WP_012919326.1                   | WP_012923059.1                   | WP_012923056.1                               |
| <i>Sediminitomix flava</i>                   | 379075     | Bacteria  | WP_109616529.1                   | WP_109618774.1                   | WP_109618766.1                               |
| <i>Taibaiella soli</i>                       | 1649169    | Bacteria  | WP_111000080.1                   | WP_110999730.1                   | WP_110997529.1                               |
| <i>Belliella buryatensis</i>                 | 1500549    | Bacteria  | WP_089238736.1                   | WP_089240074.1                   | WP_089240078.1                               |
| <i>Aquiflexum balticum</i>                   | 758820     | Bacteria  | WP_084121451.1                   | WP_084119369.1                   | WP_084119395.1                               |
| <i>Anditalea andensis</i>                    | 1048983    | Bacteria  | WP_035073830.1                   | WP_035075278.1                   | WP_035075279.1                               |
| <i>Cesiribacter andamanensis</i>             | 1279009    | Bacteria  | WP_009196574.1                   | WP_009197406.1                   | WP_009197408.1                               |
| <i>Ohtaekwangia koreensis</i>                | 688867     | Bacteria  | WP_079686329.1                   | WP_079684767.1                   | WP_079684770.1                               |
| <i>Flavobacterium johnsoniae</i>             | 376686     | Bacteria  | WP_012022820.1                   | WP_012022586.1                   | WP_012023303.1                               |
| <i>Kangiella sediminilitoris</i>             | 1144748    | Bacteria  | WP_068990479.1                   | WP_068993461.1                   | WP_068993449.1                               |
| <i>Methylocaldum marinum</i>                 | 1432792    | Bacteria  | BBA35597.1                       | BBA35436.1                       | BBA35441.1                                   |
| <i>Microbulbifer donghaiensis</i>            | 494016     | Bacteria  | WP_073275402.1                   | WP_073275006.1                   | WP_073275000.1                               |
| <i>Pseudobacteriovorax antillogorgiicola</i> | 1513793    | Bacteria  | SMF46342.1                       | SMF59929.1                       | SMF59911.1                                   |
| <i>Bradymonas sediminis</i>                  | 1548548    | Bacteria  | WP_111337759.1                   | WP_111332768.1                   | WP_111335634.1                               |
| <i>Cavenderia fasciculata</i>                | 1054147    | Eukaryota | XP_004359190.1                   | XP_004357271.1                   | XP_004351239.1                               |
| <i>Crassostrea gigas</i>                     | 29159      | Eukaryota | EKC35799.1                       | XP_011452758.1                   | XP_011415145.1                               |
| <i>Cutaneotrichosporon oleaginosum</i>       | 879819     | Eukaryota | XP_018274934.1                   | XP_018275936.1                   | XP_018276298.1                               |
| <i>Caenorhabditis elegans</i>                | 6239       | Eukaryota | NP_498284.1                      | NP_506024.3                      | NP_505450.1                                  |
| <i>Strongyloides ratti</i>                   | 34506      | Eukaryota | XP_024506610.1                   | XP_024508004.1                   | XP_024508314.1                               |
| <i>Galdieria sulphuraria</i>                 | 130081     | Eukaryota | XP_005705420.1                   | XP_005707814.1                   | XP_005706413.1                               |
| <i>Danio rerio</i>                           | 7955       | Eukaryota | NP_001096086.1                   | NP_001314753.1                   | NP_001007391.1                               |
| <i>Scleropages formosus</i>                  | 113540     | Eukaryota | XP_018591176.1                   | XP_018593530.1                   | XP_018621588.1                               |
| <i>Manacus vitellinus</i>                    | 328815     | Eukaryota | XP_017926887.1                   | XP_008918920.2                   | XP_008931159.1                               |
| <i>Zonotrichia albicollis</i>                | 44394      | Eukaryota | XP_005486392.1                   | XP_005486991.1                   | XP_005483133.1                               |
| <i>Taeniopygia guttata</i>                   | 59729      | Eukaryota | XP_002198679.1                   | XP_002192779.1                   | XP_002193125.1                               |
| <i>Ciona intestinalis</i>                    | 413601     | Eukaryota | XP_002128288.1                   | XP_002131315.1                   | XP_002119902.1                               |

**Supplementary Table S8.** Probes designed for CARD-FISH.

| Probe name      | Targeted lineage              | Targeted MAGs     | Lineage coverage   |               | Probe sequence (5'-3')  | % Formamide | Average length<br>( $\mu\text{m}$ ) ( $\pm\text{SD}$ ) | Average width<br>( $\mu\text{m}$ ) ( $\pm\text{SD}$ ) |
|-----------------|-------------------------------|-------------------|--------------------|---------------|-------------------------|-------------|--------------------------------------------------------|-------------------------------------------------------|
|                 |                               |                   | (all Lokiarchaeia) | Outgroup hits |                         |             |                                                        |                                                       |
| loki-1184       | Lokiarchaeia lineage loki1    | AMARA_1S, GC14_75 | 92.5% (85.1%)      | none          | GACCTGCCTTTGCCCGC       | 55          | 2.556 $\pm$ 1.19                                       | 1.410 $\pm$ 0.55                                      |
| heimdall-526    | Heimdallarchaeia              | Heimdall_AB_125   | 96.7%              | none          | CACTCGCAGAGCTGGTTTACCG  | 40          | 2.006 $\pm$ 0.43                                       | 1.348 $\pm$ 0.34                                      |
| Competitor name |                               |                   |                    |               | Probe sequence (5'-3')  |             |                                                        |                                                       |
| loki-1184-C1    | competitor 1 for loki-1184    |                   |                    |               | GACCTGCCGTTGCCCGC       |             |                                                        |                                                       |
| loki-1184-C2    | competitor 2 for loki-1184    |                   |                    |               | GACATGCCTTTGCCCGC       |             |                                                        |                                                       |
| heimdall-526-C1 | competitor 1 for heimdall-526 |                   |                    |               | CACTCGRAGAGCTGGTTTACCG  |             |                                                        |                                                       |
| heimdall-526-C2 | competitor 2 for heimdall-526 |                   |                    |               | CACTCGCAGAGCTGGTATTACCG |             |                                                        |                                                       |
| heimdall-526-C3 | competitor 3 for heimdall-526 |                   |                    |               | CACTCGCGAGCTGGTTTACCG   |             |                                                        |                                                       |

**Supplementary Table S9.** Major water leachable ions and elements from sediments collected in Tekirghiol and Amara Lakes during October 2017.

| <b>Ions/metals<br/>(mg·Kg<sup>-1</sup>)</b> | <b>Tekirghiol<br/>Lake</b> | <b>Amara<br/>Lake</b> |
|---------------------------------------------|----------------------------|-----------------------|
| pH of pore water                            | 7.38                       | 8.03                  |
| Na <sup>+</sup>                             | 16520                      | 7000                  |
| K <sup>+</sup>                              | 1020                       | 221                   |
| Ca <sup>2+</sup>                            | 86.4                       | 640                   |
| Mg <sup>2+</sup>                            | 1100                       | 4000                  |
| Fe <sup>*</sup>                             | 0.45                       | 0.38                  |
| Mn <sup>*</sup>                             | <0.1                       | 0.57                  |
| Cl <sup>-</sup>                             | 27700                      | 11200                 |
| SO <sub>4</sub> <sup>2-</sup>               | 250                        | 13240                 |

**Note:** Values are determined for the water-extracted fraction of the wet sediment. The \* indicates element total concentration.
